# Supplementary material for: isoTarget: A Genetic Method for Analyzing the Functional Diversity of Splicing Isoforms In Vivo
Source: PubMed Central journal article supplement — Cell Rep. Author manuscript; Available in PMC 2020 Nov 24. (PMC7685093; doi:10.1016/j.celrep.2020.108361), 2020-11-10
Supplement: NIHMS1645783-supplement-1.pdf [file NIHMS1645783-supplement-1.pdf]

Cell Reports, Volume 33

## Supplemental Information

### ***isoTarget*: A Genetic Method for Analyzing the Functional Diversity of Splicing Isoforms *In Vivo***

Hao Liu, Sarah Pizzano, Ruonan Li, Wenquan Zhao, Macy W. Veling, Yujia Hu, Limin Yang, and Bing Ye

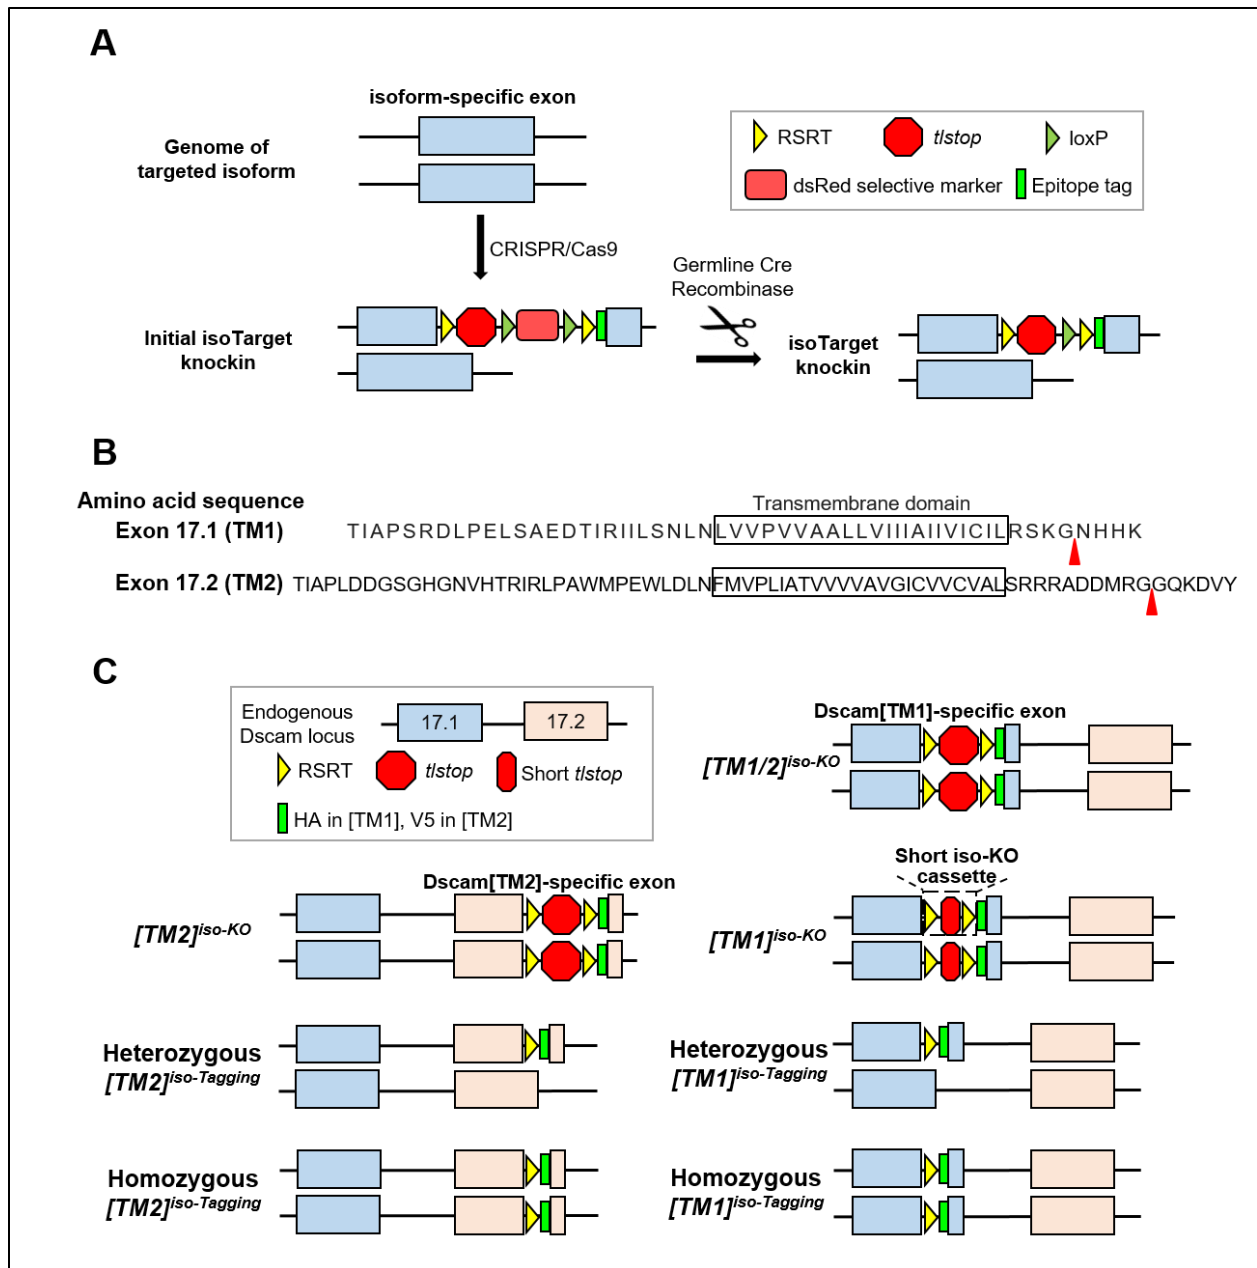

**Figure S1. The design of the *isoTarget* cassette. (Related to Figure 1)**

(A) At the core of the cassette is the *t/stop* box that contains multiple termination codons to ensure the disruption of mRNA translation. The *t/stop* is flanked by two RSRT sites followed by an epitope tag for achieving cell-type-specific labeling of targeted isoforms through inducible site-specific recombination. To facilitate the screening of animals with successful integrations of the *isoTarget* cassette, a transgene expressing dsRed under the 3xP3 enhancer/Hsp70 promoter is inserted in between the *t/stop* and the second

RSRT site. The dsRed transgene is flanked by two loxP sites, allowing the removal of the dsRed in the presence of Cre recombinase. The *isoTarget* cassette can be knocked into the exon encoding the targeted isoform by CRISPR/Cas9.

**(B)** The *isoTarget* insertion sites in *Dscam*[TM1] and [TM2] isoforms. Shown are the amino acid sequences encoded by the 17.1 (TM1) and 17.2 (TM2) exons. Red arrowheads indicate the insertion sites in the juxtamembrane regions.

**(C)** Applying *isoTarget* to study *Dscam* isoforms. As shown later, iso-KO of *Dscam*[TM1] impairs both *Dscam*[TM1] and [TM2] expression and is thus named *Dscam*[TM1/2]<sup>iso-KO</sup>. We created a short *t/stop* cassette (“short iso-KO”) that specifically knocks out [TM1], but not [TM2]. Iso-Tagging of *Dscam*[TM1] does not affect [TM1] functions. Iso-KO of [TM2] only abolishes *Dscam*[TM2] functions, and iso-Tagging of *Dscam*[TM2] does not affect [TM2] functions. Depending on the purpose of the experiment, *Dscam*[TM1] and [TM2] can be tagged either globally or specifically in targeted cell types.

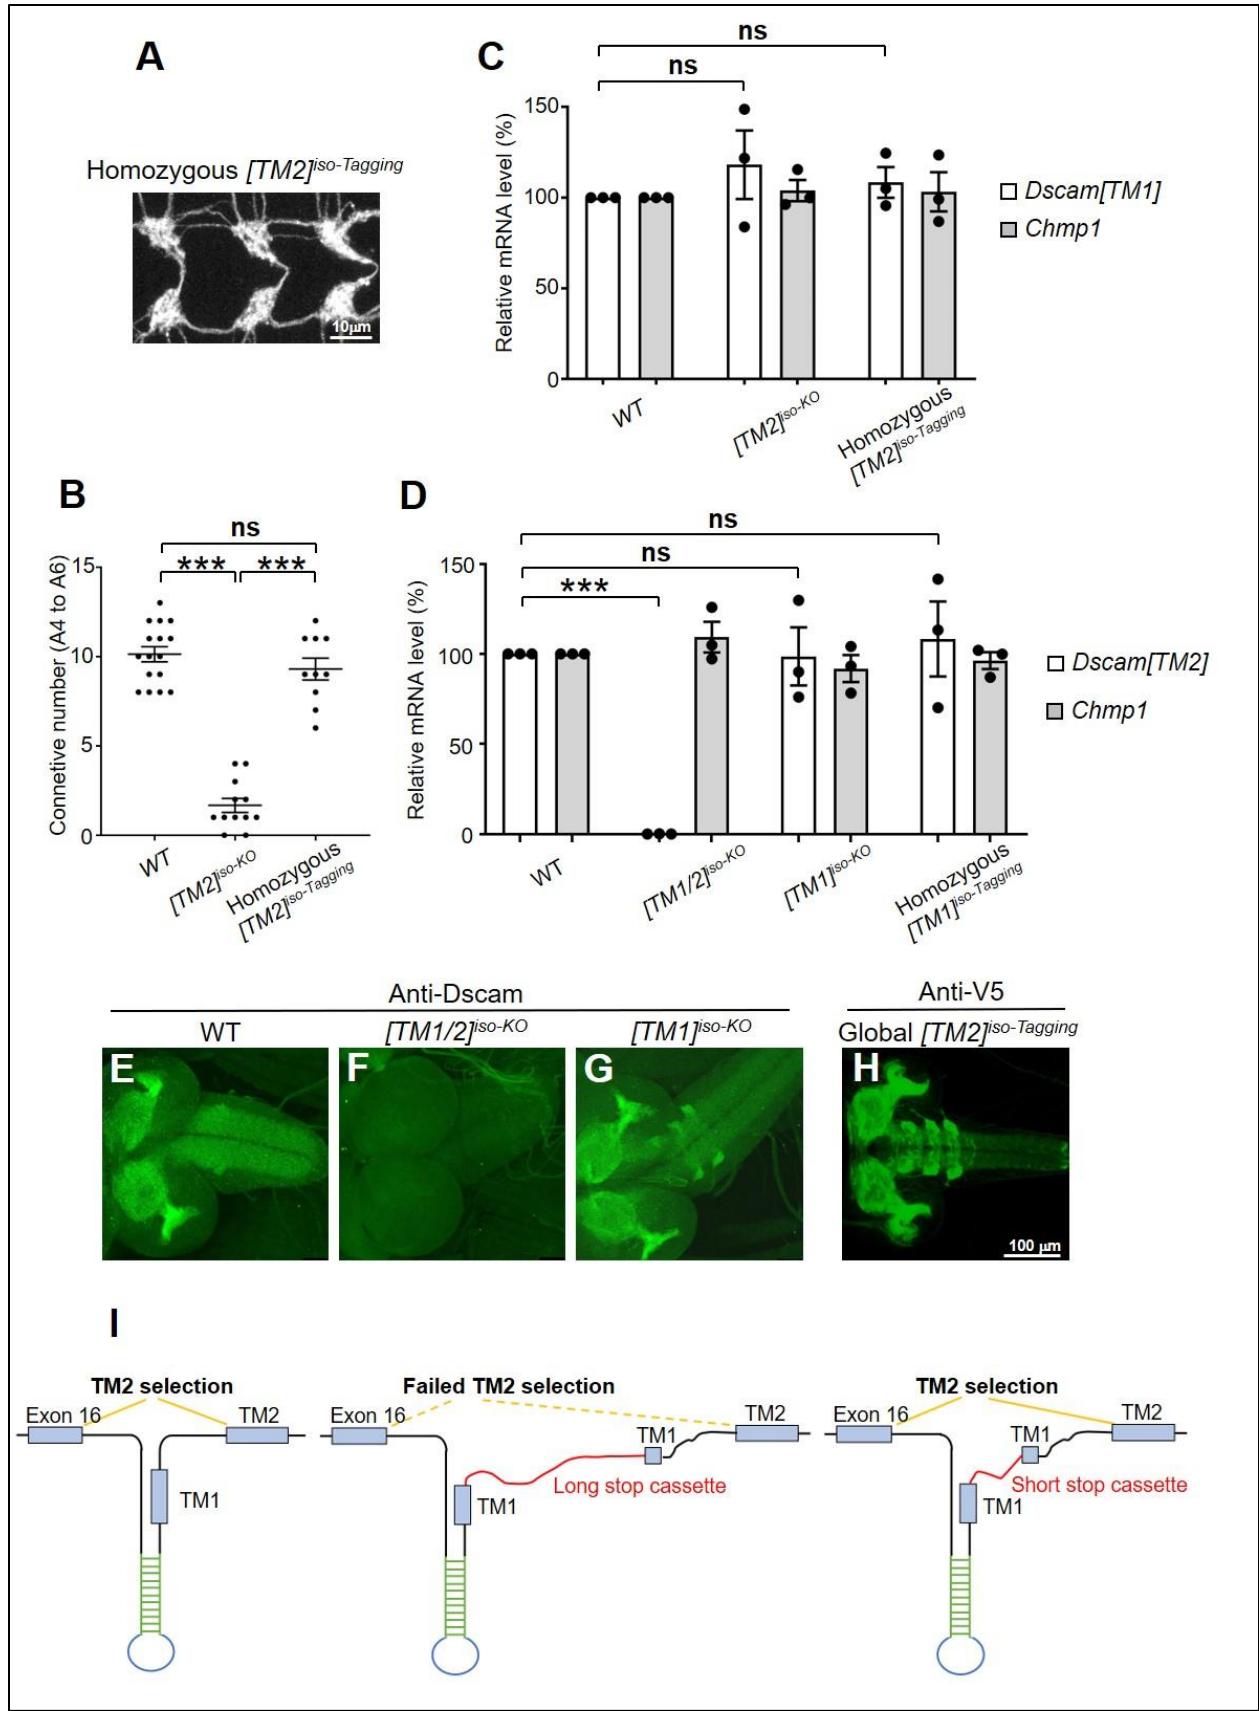

**Figure S2. Validation of *isoTarget* and the discovery of the short *tlstop* cassette. (Related to Figure 1 and 2A-B)**

(A) *Dscam*[*TM2*]<sup>*iso-Tagging*</sup> does not affect *Dscam*[*TM2*] functions. As shown in Figure 2A and B, [*TM2*]<sup>*iso-KO*</sup> impairs axon terminal growth in C4da neurons. The axonal defect is completely rescued in homozygous global [*TM2*]<sup>*iso-Tagging*</sup> larvae generated by excision of the RSRT-*tlstop*-RSRT box from the *iso-KO*. Shown are the C4da axon terminals in A4-A6 segments.

(B) Quantification of the number of C4da axon connectives.

(C) Neither global [*TM2*]<sup>*iso-KO*</sup> nor homozygous global [*TM2*]<sup>*iso-Tagging*</sup> affect the mRNA levels of *Dscam*[*TM1*]. mRNAs from the whole CNS of 3<sup>rd</sup> instar larvae were used for reverse-transcription real-time PCR. The  $\Delta$ Ct value of *Dscam*[*TM2*] mRNA is normalized to that of the *elav* gene as described in the Experimental Procedure. *Chmp1* serves as the internal control. Each dot represents one independent experiment.

(D) *Dscam*[*TM2*] mRNA is undetectable in global *Dscam*[*TM1*] *isoTarget* flies resulted from the insertion of the original long *tlstop* cassette ([*TM1/2*]<sup>*iso-KO*</sup>), but remains intact in global *Dscam*[*TM1*] *isoTarget* flies generated by the insertion of the short *tlstop* cassette ([*TM1*]<sup>*iso-KO*</sup>). *Dscam*[*TM2*] mRNA level is not affected in homozygous global [*TM1*]<sup>*iso-Tagging*</sup> larvae. mRNAs from the whole CNS of 3<sup>rd</sup> instar larvae were used for reverse-transcription real-time PCR.

(E-H) Immunostaining of the CNS with an anti-*Dscam* antibody shows that while *Dscam* expression is abolished in global *Dscam*[*TM1/2*]<sup>*iso-KO*</sup> (F), it is detectable in global *Dscam*[*TM1*]<sup>*iso-KO*</sup> (G). Moreover, the *Dscam* expression pattern in *Dscam*[*TM1*]<sup>*iso-KO*</sup>, which is presumably *Dscam*[*TM2*], is similar to endogenous *Dscam*[*TM2*] labeled by global *Dscam*[*TM2*]<sup>*iso-Tagging*</sup> (H).

(I) A schematic model of exon 17 selection from *Dscam* pre-mRNA, based on a previous study (Anastassiou et al., 2006). The complementary sequences (green) form a stem-loop, which is required for the selection of the *TM2* exon (17.2) into *Dscam* mRNA. Inserting a long cassette into the *TM1* exon (17.1) may create a long distance that eliminates the *TM2* exon selection.

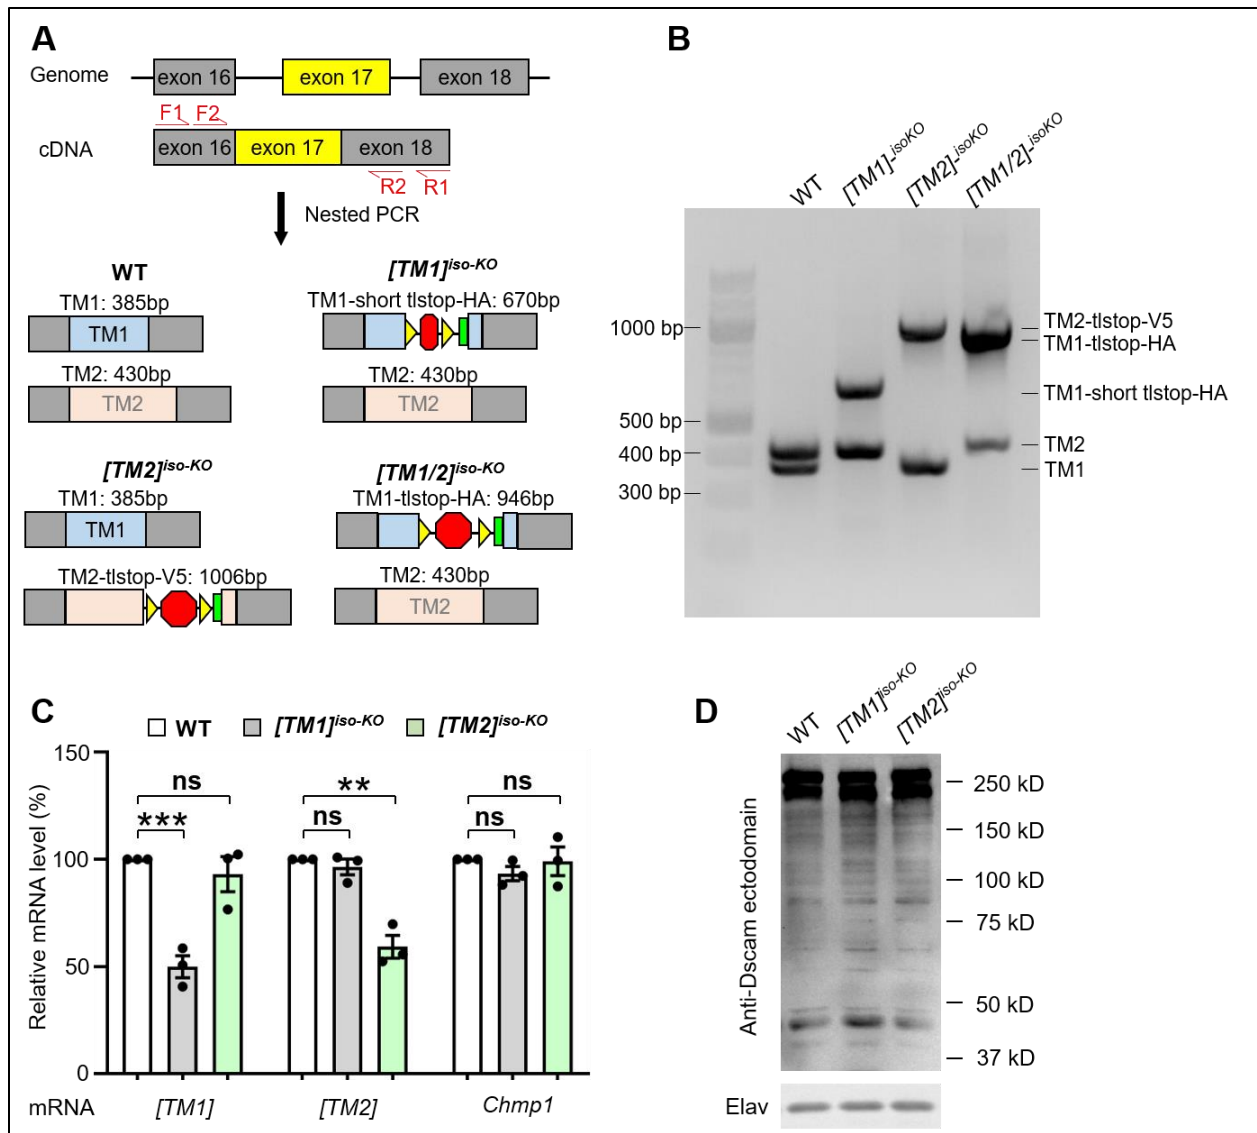

**Figure S3. The effect of *isoTarget* cassettes on alternative splicing, mRNA and protein expression of targeted isoforms. (Related to Figure 1B)**

(A-B) *isoTarget* cassettes do not introduce aberrant exons during alternative splicing.

(A) Scheme of nested PCRs to detect the splicing variants between exon 16 and 18 in the *Dscam* gene in wild-type (WT), *Dscam*[*TM1*]<sup>iso-KO</sup>, *Dscam*[*TM2*]<sup>iso-KO</sup>, and *Dscam*[*TM1/2*]<sup>iso-KO</sup>. The WT cDNAs are expected to produce the 385-bp TM1 and 430-bp TM2 bands. The *Dscam*[*TM1*]<sup>iso-KO</sup> cDNAs should produce a TM2 band (430 bp) and an altered TM1 band that contains the short iso-KO cassette (670 bp). The *Dscam*[*TM2*]<sup>iso-KO</sup> cDNAs should produce a TM1 band (385 bp) and an altered TM2

band that contains the regular iso-KO cassette (1006 bp). *Dscam*[*TM1/2*]<sup>iso-KO</sup> was used as a positive control for the assay sensitivity, as it abolishes over 99% of *Dscam*[*TM2*] mRNA (Figure S3A). See STAR Method for the sequences of PCR primers.

**(B)** No aberrant exon was observed in *iso-KO* mutants of *Dscam*. A dim, yet clear, 430-bp *Dscam*[*TM2*] band was seen in *Dscam*[*TM1/2*]<sup>iso-KO</sup>, demonstrating the high sensitivity of the PCR assay.

**(C)** *isoTarget* cassettes reduce the mRNA levels of targeted isoforms. mRNAs from the whole CNS of 3<sup>rd</sup> instar larvae were used for reverse-transcription real-time PCR.

**(D)** Western blotting with an antibody against a common ectodomain epitope of *Dscam*. No band was observed at the expected size of truncated polypeptides resulting from insertion of iso-KO cassettes (~180 kD) or at other molecular weights in iso-KO mutants.

**C4da neuron dendrites**

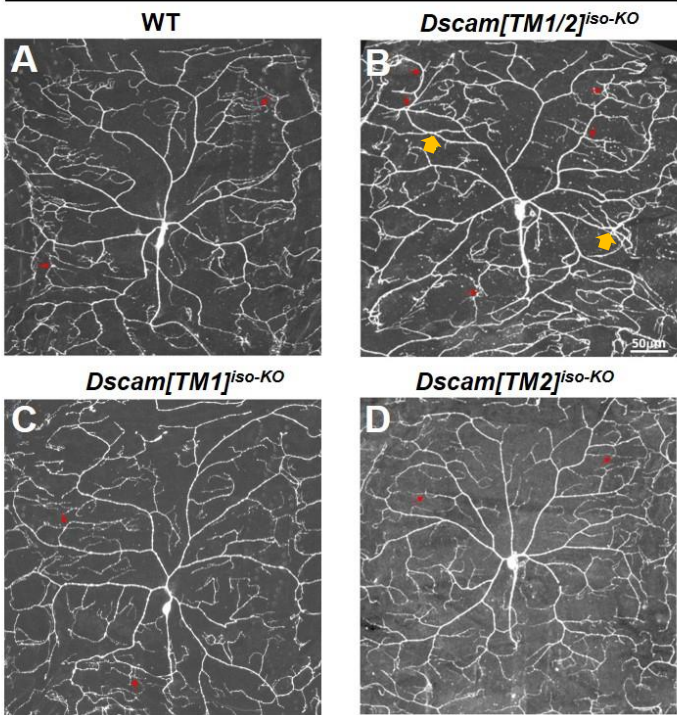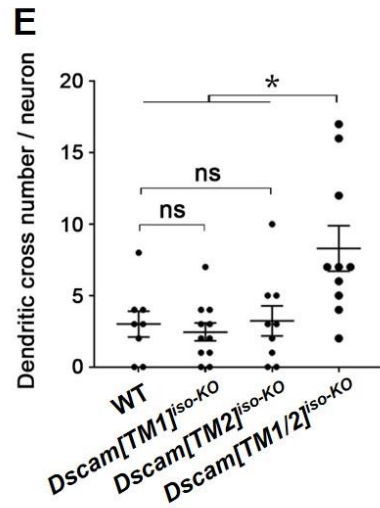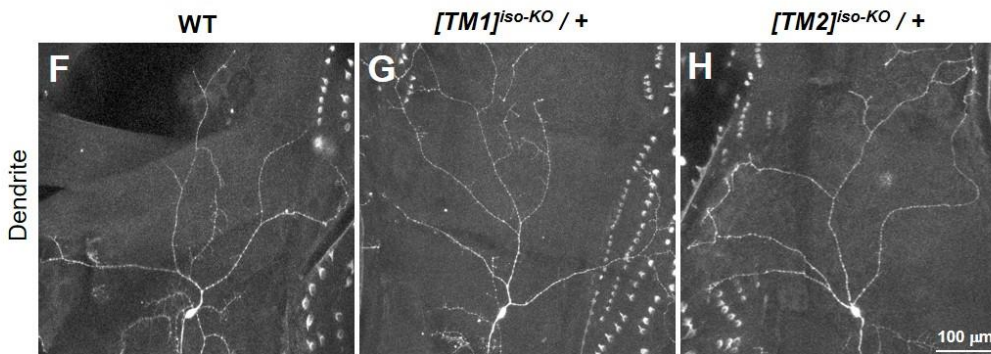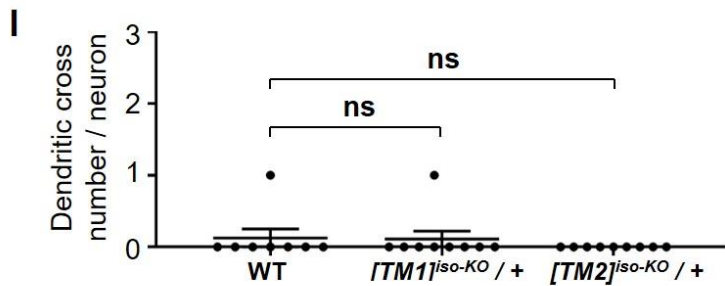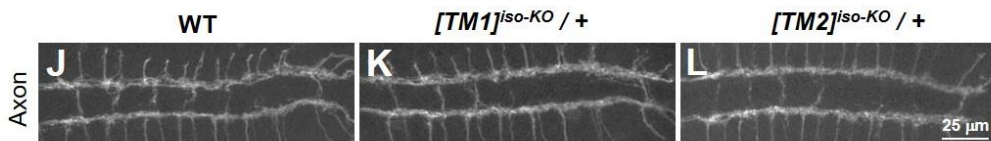



**Figure S4. *Dscam*[*TM1*] and [*TM2*] function redundantly in mediating dendritic self-avoidance in C4da neurons. (Related to Figure 3)**

(A-D) While *Dscam*[*TM1/2*]<sup>*iso-KO*</sup> (B) increases the crossing of dendritic branches in C4da neurons in 3<sup>rd</sup> instar larvae, neither *Dscam*[*TM1*]<sup>*iso-KO*</sup> nor *Dscam*[*TM2*]<sup>*iso-KO*</sup> impairs dendritic self-avoidance (C & D). Small red arrows point to crossings of fine dendritic branches, and large yellow arrows point to crossings of major dendritic branches, which is only observed when both isoforms are lost.

(E) Quantification of dendritic branch crosses in the C4da neuron ddaC.

(F-L) *Dscam*<sup>*iso-KO*</sup> mutants are not dominant negative. Compared with WT (F), no dendritic self-avoidance is observed in heterozygotes of *Dscam*[*TM1*]<sup>*iso-KO/+*</sup> (G) or *Dscam*[*TM2*]<sup>*iso-KO/+*</sup> (H). Quantification of dendritic branch crossings in the C3da neuron ddaF is shown in (I). Compared with WT (J), no axonal growth defect is observed in C3da neurons in larvae that are *Dscam*[*TM1*]<sup>*iso-KO/+*</sup> (K) or *Dscam*[*TM2*]<sup>*iso-KO/+*</sup> (L).

Sample numbers (neurons) for F-H: WT, 8; *Dscam*[*TM1*]<sup>*iso-KO/+*</sup>, 9; *Dscam*[*TM2*]<sup>*iso-KO/+*</sup>,

9. Sample numbers (VNCs) for J-L: WT, 7; *Dscam*[*TM1*]<sup>*iso-KO/+*</sup>, 7; *Dscam*[*TM2*]<sup>*iso-KO/+*</sup>,

8.

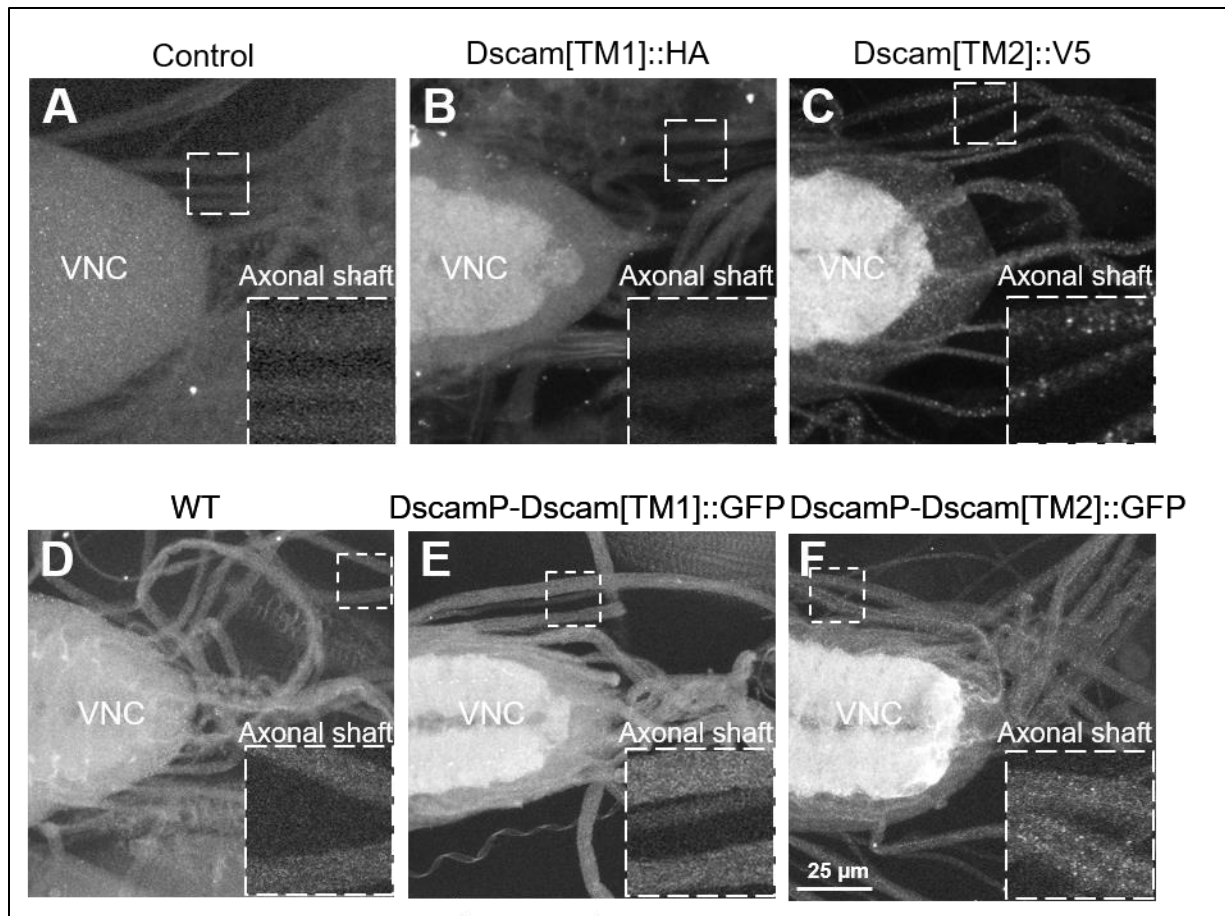

**Figure S5. Endogenous Dscam[TM2], but not [TM1], is localized in axons connecting the CNS and PNS. (related to Figure 4)**

(A-C) Endogenous Dscam[TM1] (*Dscam[TM1]::HA<sup>iso-Tagging</sup>*) is observed in VNC neuropil region, but not in axonal shafts. By contrast, endogenous Dscam[TM2] (*Dscam[TM2]::V5<sup>iso-Tagging</sup>*) is localized in axon shafts besides the VNC neuropil. The insets are magnified views of the boxed regions.

(D-F) Transgenic Dscam[TM1]::GFP expressed by the endogenous *Dscam* promoter is observed in VNC neuropil region, but not in axonal shafts. By contrast, puncta of transgenic Dscam[TM2]::GFP expressed by the endogenous *Dscam* promoter are localized in axon shafts besides the VNC neuropil.

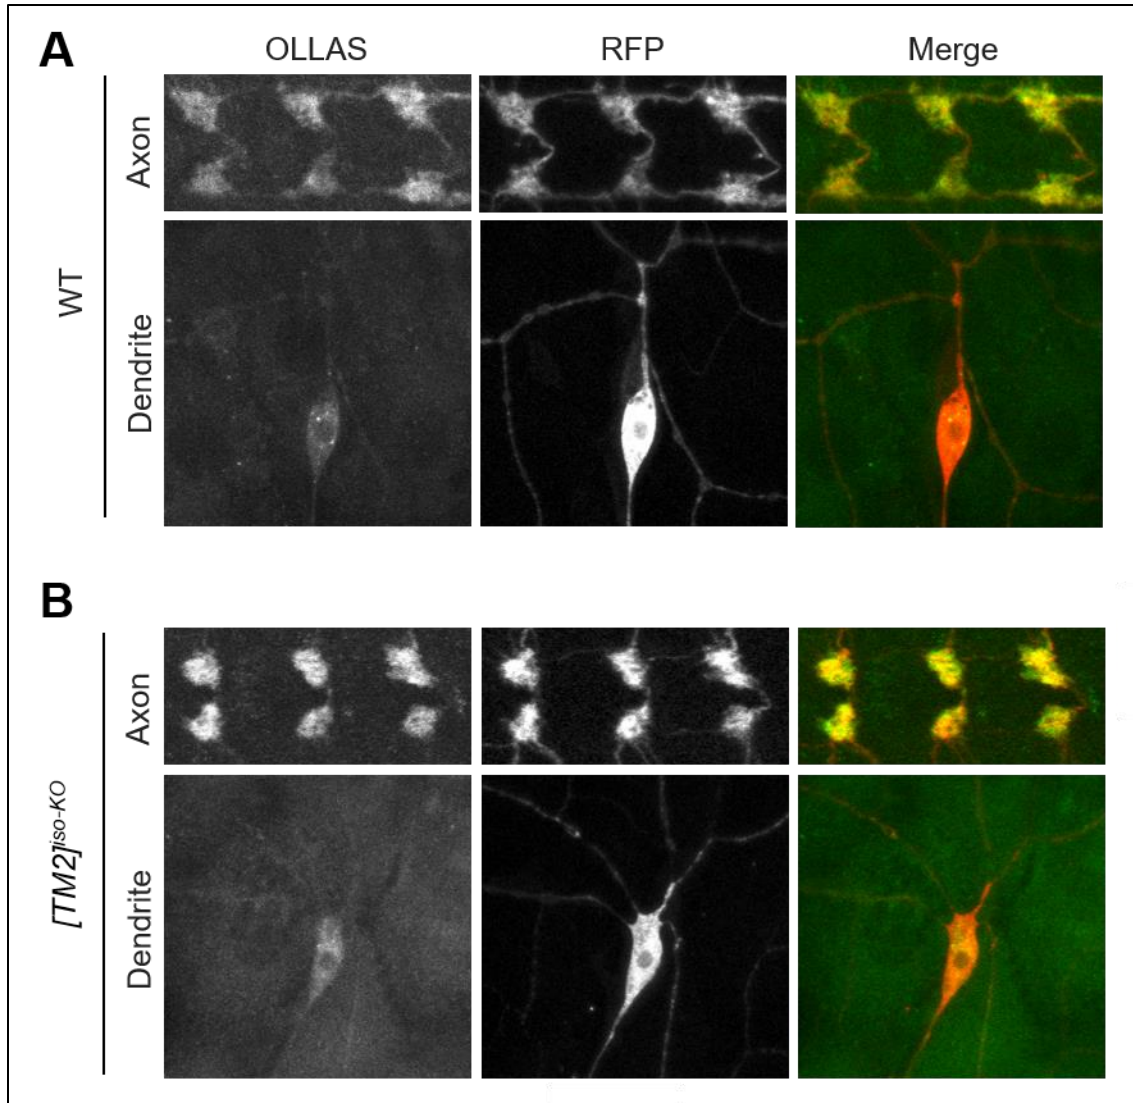

**Figure S6. Dock is enriched in axons in both wild-type and *Dscam[TM2]<sup>iso-KO</sup>*. (related to Figure 6)**

(A) Dock is enriched in axons in WT C4da neurons. OLLAS-tagged Dock (Dock::OLLAS) was expressed in C4da neurons by *ppk-Gal4*. mCD8::RFP was used to label the neurons. While Dock::OLLAS is enriched in axon terminals, little is observed in dendrites.

(B) Dock is also enriched in axons in *Dscam[TM2]<sup>iso-KO</sup>*

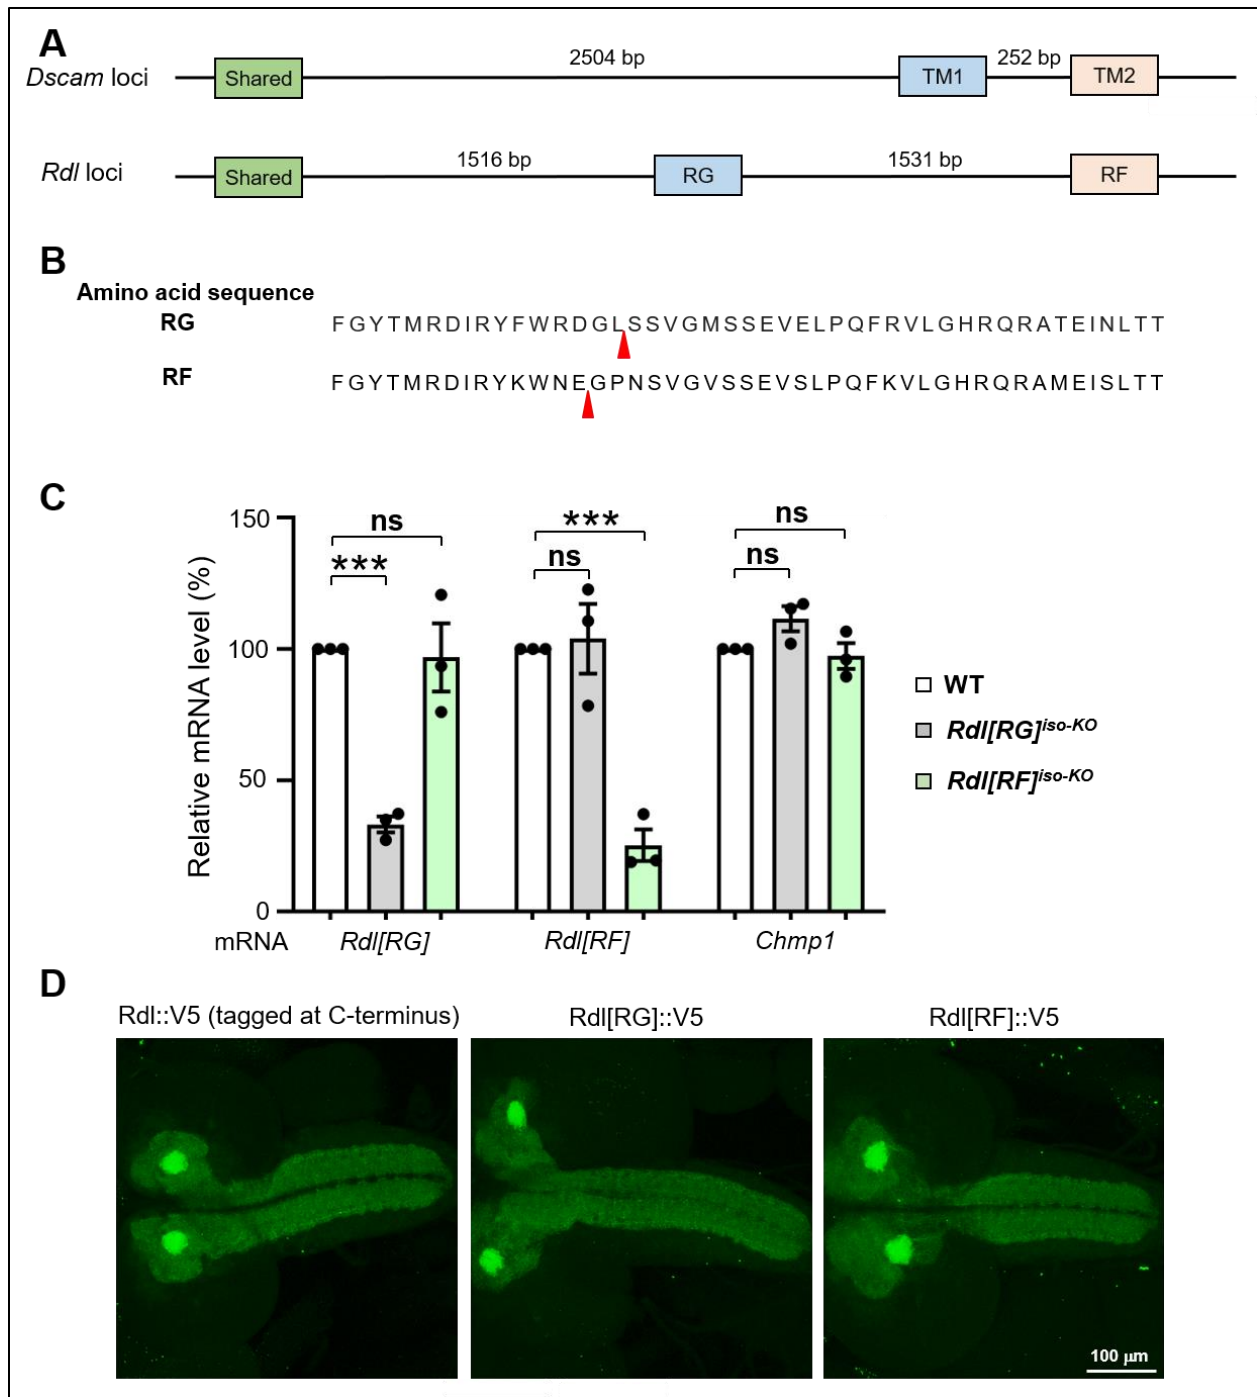

**Figure S7. Applying *isoTarget* to study Rdl isoforms. (related to Figure 1)**

(A) Schematics showing the introns and exons of interest in *Dscam* and *Rdl*.

(B) The *isoTarget* insertion sites in the RG and RF isoforms of Rdl. Shown are the amino acid sequences encoded by the RG and RF exons. Red arrowheads indicate the insertion sites.

(C) The full-length *iso-KO* cassette reduces the mRNA level of the targeted isoform but not that of the other isoform. mRNAs from the whole CNS of 3<sup>rd</sup> instar larvae were used for reverse-transcription real-time PCR.

(D) Endogenous RG and RF isoforms of Rdl show similar expression patterns that are comparable with that of total Rdl. The pan-neuronal driver *elav-Gal4* was used to tag endogenous Rdl[RG] or Rdl[RF] or RDL by driving the expression of UAS-R-recombinase. Shown is the staining of V5 epitope tag.
