# Supplementary material for: isoTarget: A Genetic Method for Analyzing the Functional Diversity of Splicing Isoforms In Vivo
Source: PubMed Central journal article supplement — Cell Rep. Author manuscript; Available in PMC 2020 Nov 24. (PMC7685093; doi:10.1016/j.celrep.2020.108361), 2020-11-10
Supplement: NIHMS1645783-supplement-2.pdf [file NIHMS1645783-supplement-2.pdf]

# *isoTarget*: A Genetic Method for Analyzing the Functional Diversity of Splicing Isoforms *In Vivo*

## Graphical Abstract

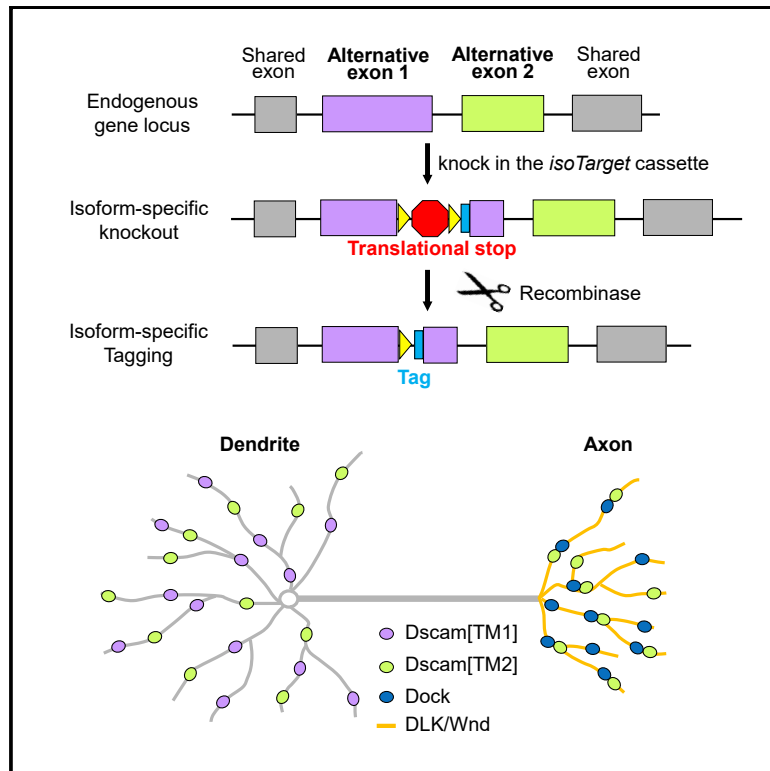

## Authors

Hao Liu, Sarah Pizzano, Ruonan Li, ..., Yujia Hu, Limin Yang, Bing Ye

## Correspondence

bingye@umich.edu

## In Brief

Liu et al. develop a genetic method that enables the investigation of isoform-specific function, expression, localization, and signaling of endogenous proteins in select cells. Using this method, they demonstrate that the difference in subcellular localization of two isoforms of Down syndrome cell adhesion molecule leads to functional differences between them.

## Highlights

- Translational stop cassettes allow isoform-specific manipulations of genes
- *isoTarget* enables multi-purpose studies of a targeted isoform in select cells
- The subcellular localizations of Dscam isoforms determine their cellular functions
- *isoTarget* is generalizable for studying alternative splicing isoforms

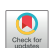

## Resource

# *isoTarget*: A Genetic Method for Analyzing the Functional Diversity of Splicing Isoforms *In Vivo*

Hao Liu,<sup>1,2</sup> Sarah Pizzano,<sup>1</sup> Ruonan Li,<sup>1</sup> Wenquan Zhao,<sup>1</sup> Macy W. Veling,<sup>1</sup> Yujia Hu,<sup>1</sup> Limin Yang,<sup>1,3</sup> and Bing Ye<sup>1,2,4,\*</sup><sup>1</sup>Life Sciences Institute, University of Michigan, Ann Arbor, MI 48109, USA<sup>2</sup>Department of Cell and Developmental Biology, University of Michigan, Ann Arbor, MI 48109, USA<sup>3</sup>School of Medicine, Dalian University, Dalian, Liaoning, 116622, China<sup>4</sup>Lead Contact\*Correspondence: [bingye@umich.edu](mailto:bingye@umich.edu)<https://doi.org/10.1016/j.celrep.2020.108361>

## SUMMARY

Protein isoforms generated by alternative splicing contribute to proteome diversity. Because of the lack of effective techniques, the isoform-specific function, expression, localization, and signaling of endogenous proteins are unknown for most genes. Here, we report a genetic method, *isoTarget*, for multi-purpose studies of targeted isoforms in select cells. Applying *isoTarget* to two isoforms of *Drosophila* Dscam, Dscam[TM1] and [TM2], we found that, in neurons, endogenous Dscam[TM1] is in dendrites, whereas Dscam[TM2] is in both dendrites and axons. We demonstrate that the difference in subcellular localization, rather than biochemical properties, leads to the two isoforms' functional differences. Moreover, we show that the subcellular enrichment of functional partners results in a DLK/Wallenda-Dscam[TM2]-Dock signaling cascade in axons. We further apply *isoTarget* to study two isoforms of a GABA receptor to demonstrate its general applicability. *isoTarget* is an effective technique for studying how alternative splicing enhances proteome complexity.

## INTRODUCTION

Alternative splicing is a fundamental biological process that expands proteome diversity in eukaryotes. Genome-wide transcriptome analyses have shown that 90%–95% of human genes encode two or more isoforms (Baralle and Giudice, 2017). The percentage of multi-exonic genes that undergo alternative splicing is estimated to be 63% in mice, 45% in *Drosophila*, and 25% in *Caenorhabditis elegans* (Lee and Rio, 2015). Alternative splicing is regulated by the coordination of RNA-binding proteins, RNA polymerase II, and epigenetic modifications of DNA (Baralle and Giudice, 2017). Perturbations of RNA splicing cause neurodevelopmental, cardiovascular, and other diseases (Baralle and Giudice, 2017; Scotti and Swanson, 2016). Despite the importance of alternative splicing, how distinct protein isoforms resulting from alternative splicing differ in their functions and regulations is poorly understood. In fact, the cellular functions, endogenous expression and localization, and signaling cascades of individual splicing isoforms are only known for a very few genes (Baralle and Giudice, 2017).

Protein isoforms encoded by alternative exons often differ in their structures and biochemical properties, which lead to the distinct functions of the isoforms (Kelemen et al., 2013). In addition, different types of cells may express different splicing variants (Baralle and Giudice, 2017), which further diversifies the biological functions of different isoforms. Intriguingly, different

protein isoforms of some genes are localized to distinct subcellular compartments within a cell (Baralle and Giudice, 2017; Kelemen et al., 2013; Lee et al., 2016; Lerch et al., 2012; Yap and Makeyev, 2016). Compared with our understanding of how biochemical and expressional differences contribute to distinct functions of splicing isoforms, much less is known about whether and how isoform-specific subcellular localization contributes to distinct cellular functions. This is a challenging problem because solving it requires manipulating a specific isoform at its endogenous locus—without affecting other isoforms—in a cell-specific fashion.

Transgene-mediated overexpression of splicing variants of interest is widely used for studying isoform-specific functions and subcellular localization in specific cells. However, it is well documented that overexpressed proteins often do not mimic the endogenous proteins in their spatiotemporal expression, localization, and functions (Baralle and Giudice, 2017; Kelemen et al., 2013; Moriya, 2015; Prelich, 2012).

Here, we report a genetic method, termed *isoTarget*, for studying isoform-specific functions, localizations, and signaling of endogenous splicing isoforms of interest. This method allows us to knock out select isoforms for functional studies and to tag the endogenous proteins conditionally for multi-disciplinary analyses in specific cells without affecting other isoforms. To achieve that, we created a translational stop sequence, used it to generate a cleavable cassette that contained an epitope tag

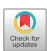

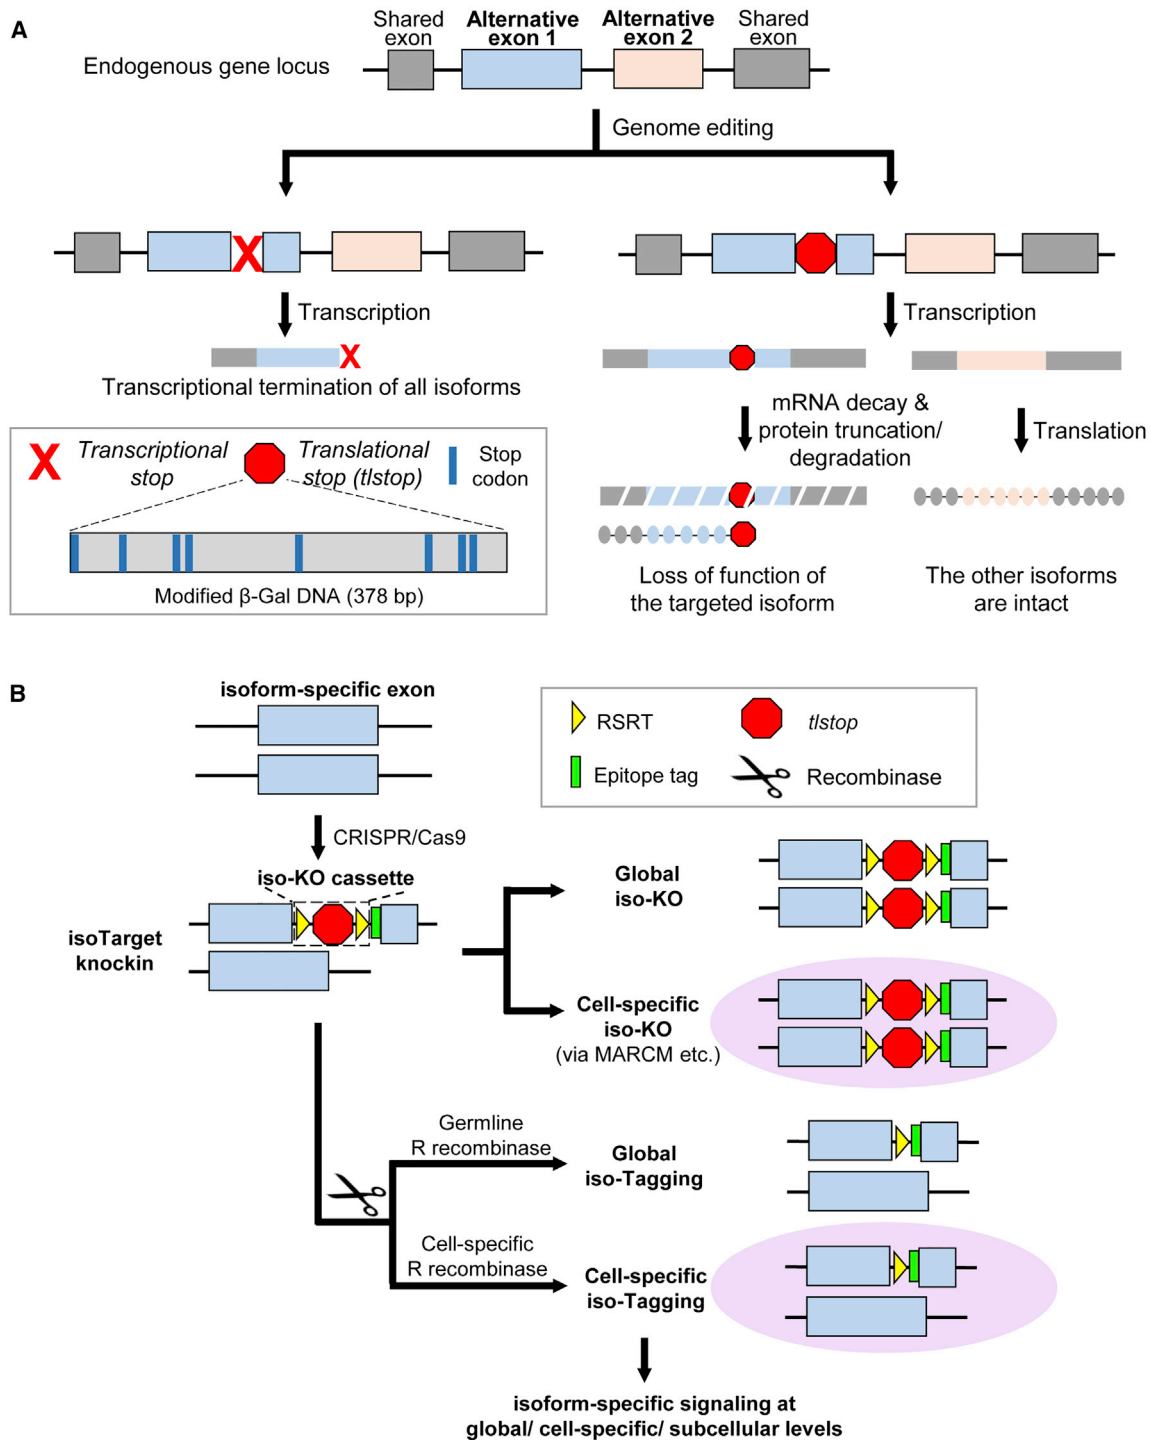

**Figure 1. Design of *isoTarget* and Its Application to Studying the Functional Diversity of Splicing Isoforms**

(A) Introducing translational stops into alternative exons allows isoform-specific manipulations of the gene. Inserting the commonly used transcriptional stop cassette into an alternative exon leads to transcriptional termination of all isoforms downstream of the targeted exon (left branch). To specifically manipulate one isoform (right branch), we engineered a *translational stop (tstop)* cassette by introducing multiple stop codons into the DNA sequence encoding a non-catalytic region of  $\beta$ -Gal (bottom left). This *tstop* cassette causes loss of function in targeted isoform by translational truncation or, possibly, mRNA decay.

(B) Combining *tstop* with other genetic methods for multi-purpose studies of the targeted splicing isoform. The *isoTarget* cassette, which consists of an RSRT site, a translational stop (*tstop*), a second RSRT site, and an epitope tag, is inserted into an isoform-specific exon by CRISPR/Cas9-mediated genome editing. The insertion is expected to generate a loss-of-function allele of the targeted isoform. Single cells that are homozygous for the targeted allele can be produced by

(legend continued on next page)

for conditional tagging, and inserted the cassette into the exon encoding the isoform of interest. As a proof-of-concept, we applied *isoTarget* to study two mutually exclusive isoforms of *Drosophila* Down syndrome cell-adhesion molecule (Dscam), Dscam[TM1] and [TM2] (Schmucker et al., 2000; Wang et al., 2004; Zhan et al., 2004). We demonstrate that isoform-specific functions for Dscam[TM1] and [TM2] result from the distinct endogenous subcellular localization patterns of these two isoforms. We further describe a compartment-specific signaling pathway in the axon terminals, which involves Dscam[TM2], but not [TM1], because of the differential localization of the two isoforms and their functional partners. Furthermore, we applied *isoTarget* to study two isoforms of the GABA receptor resistance to dieldrin (Rdl), illustrating the general applicability of the method. These findings illustrate the versatility of *isoTarget* in isoform studies and its effectiveness in uncovering mechanisms governing the expansion of proteome diversity by alternative splicing *in vivo*. In addition, they establish the causality between the subcellular localization and cellular function of Dscam splicing isoforms, demonstrating the critical role of subcellular localization in expanding the functional diversity of splicing isoforms.

## RESULTS

### The Design of *isoTarget*

The transcriptional stop cassettes commonly used for conditional knockouts or knockins (Lakso et al., 1992) do not specifically disrupt the expression of a select splicing isoform and are, hence, not applicable for isoform-specific studies. This is because RNA splicing occurs after transcription and, consequently, transcriptional stop cassettes disrupt the expression of all isoforms downstream of the targeted isoform (Figure 1A). We created a *translational stop* (*tlstop*) sequence by introducing multiple stop codons (TAA, TAG, or TGA) into the DNA sequence encoding a non-catalytic region of  $\beta$ -galactosidase ( $\beta$ -Gal) (Figures 1A and S1A). By design, the presence of a *tlstop* in an alternatively spliced exon would lead to isoform-specific protein truncation or nonsense-mediated mRNA decay (NMD) (Brognia and Wen, 2009; Smith and Baker, 2015), causing the targeted isoform to lose its function (Figure 1A). By contrast, other alternatively spliced exons would not be affected.

To achieve cell-type-specific labeling of targeted isoforms, the *tlstop* sequence is flanked by two R recombinase recognition sites (RSRTs) and then followed by an epitope tag (Chen et al., 2014; Nern et al., 2011). When R recombinase is expressed to remove *tlstop*, the epitope tag is inserted in-frame into the targeted isoform, allowing the detection and biochemical analyses of endogenous proteins in cells of interest (Figure 1B). We refer to the RSRT-*tlstop*-RSRT as “iso-KO cassette” (for “*isoTarget* knockout cassette”), because its insertion into an isoform-specific exon is expected to create a loss-of-function mutant of

that particular isoform. In *Drosophila*, the *iso-KO* alleles can be used in combination with mosaic analysis with a repressible cell marker (MARCM) (Lee and Luo, 1999) to study the isoform-specific function in targeted single neurons (Figure 1B). We refer to the epitope tagging resulting from the excision of the *tlstop* sequence as “iso-tagging”. As shown below, the iso-tagging approach allows the investigation of upstream and downstream signaling mechanisms that involve targeted isoforms at the organismal, cell-type-specific, or subcellular levels (Figure 1B).

### The Validation of *isoTarget* and Mitigation of Off-Target Effects of Translational-Stop Cassettes

For the designed applications, the *isoTarget* technique should meet the following requirements. First, the iso-KO cassette must abolish the function of the targeted isoform. Second, iso-KO or iso-tagging of one isoform should not impair the expression of other isoforms. Third, iso-tagging, which results from the excision of the iso-KO cassette, should restore the isoform functions disrupted by the iso-KO cassette. We determined whether *isoTarget* met these requirements by testing it on the *Drosophila* Dscam gene.

In *Drosophila*, exons 17.1 and 17.2 of the Dscam gene encode two different transmembrane and juxtamembrane domains (TM) (Schmucker et al., 2000). Alternative splicing of these two mutually exclusive exons produces two isoforms called Dscam[TM1] and Dscam[TM2] (Figure S1B). We inserted the iso-KO cassette into the juxtamembrane domain in exon 17.1 (TM1) and 17.2 (TM2) (Figures S1B and S1C). In homozygous Dscam[TM2] iso-KO (*Dscam[TM2]<sup>iso-KO</sup>*) larvae, the axon terminal growth was dramatically impaired in the class IV dendritic arborization (C4 da) neurons (Figures 2A, 2B, and 2H), a widely used model for studying dendrite and axon development (Grueber and Jan, 2004; Grueber et al., 2007; Jan and Jan, 2010; Ye et al., 2007). This is consistent with previous reports that Dscam is required for axon terminal growth in C4 da neurons (Kim et al., 2013) and suggests that the iso-KO cassette abolishes Dscam[TM2] functions. Excision of the iso-KO cassette allowed us to generate homozygous global Dscam[TM2] iso-tagging larvae (*Dscam[TM2]<sup>iso-tagging</sup>*) (Figures S1C). C4 da axon terminals of *Dscam[TM2]<sup>iso-tagging</sup>* larvae were indistinguishable from those of the wild type (Figures S2A and S2B), suggesting that tagging endogenous Dscam[TM2] with the V5-tag does not disrupt the function of the isoform.

Next, we determined whether the *isoTarget* of one isoform affected the expression of another isoform by using reverse-transcription real-time PCR and immunohistochemistry on *isoTarget* samples. Dscam[TM1] mRNA levels were not affected in the central nervous system (CNS) of homozygous Dscam [TM2]<sup>iso-KO</sup> or Dscam[TM2]<sup>iso-tagging</sup> third-instar larvae (Figure S2C). Unexpectedly, inserting the iso-KO cassette into Dscam[TM1] abolished Dscam[TM2] mRNA and protein expression, creating a loss-of-function mutant for both Dscam[TM1] and [TM2] (*Dscam[TM1/2]<sup>iso-KO</sup>*) (Figures S2D, S2E, and S2F).

genetic mosaic techniques, such as MARCM. The endogenous isoforms can be visualized in specific cells by selective expression of R recombinase to remove the RSRT-*tlstop*-RSRT cassette. Expression of R recombinase in female germline cells leads to tagging of the isoform in all cells that express that isoform in the progeny (“global iso-tagging”). Expression of R recombinase in specific cell types or single cells leads to tagging of the isoform in those cells. In the iso-tagged flies, upstream regulators and downstream effectors of specific isoforms can be identified through genetic, cell biological, and biochemical analyses. See also Figures S1–S3 and S7.



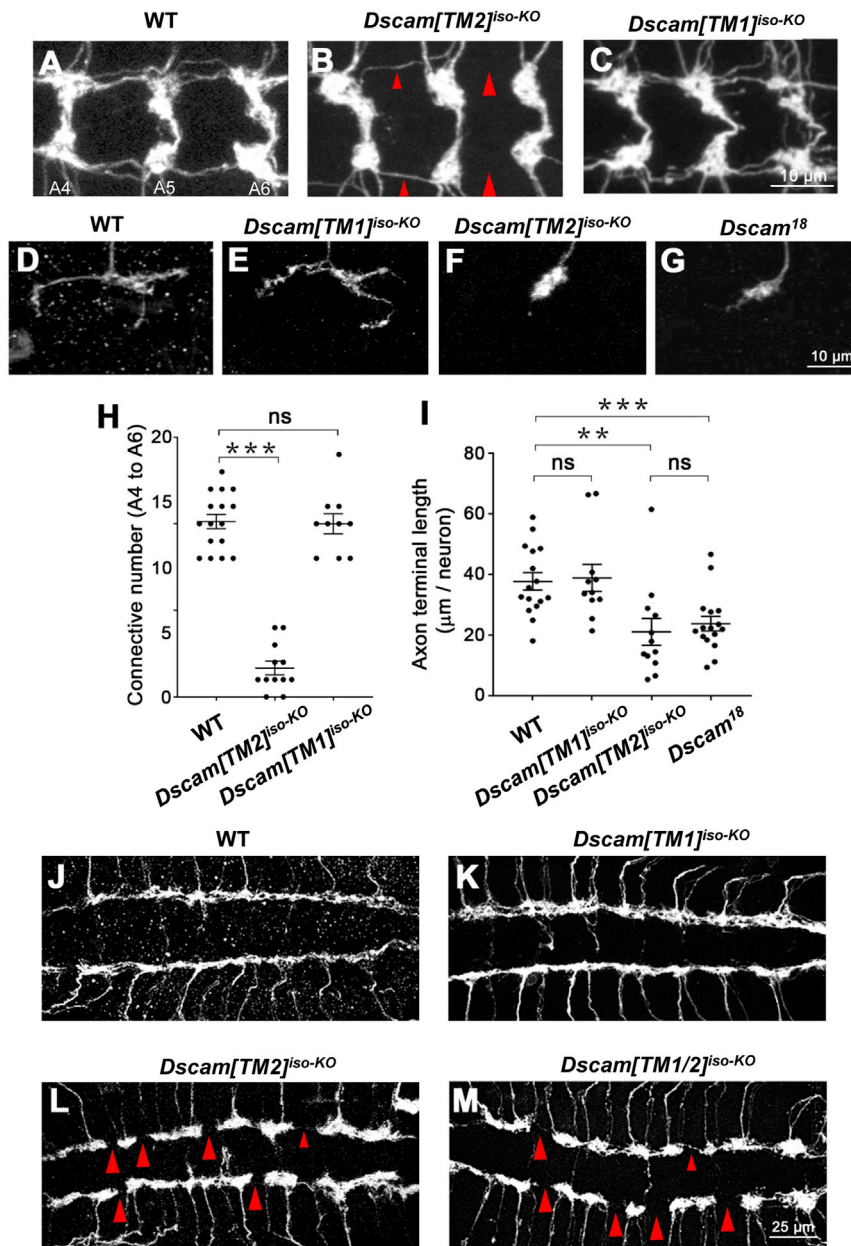

By contrast, the expression of *Dscam*[TM2] mRNA was not affected in *Dscam*[TM1]<sup>iso-tagging</sup> (Figure S2D). These results suggest that inserting a long piece of DNA in the TM1-encoding exon disrupts the splicing of the TM2-encoding exon of *Dscam* pre-mRNA (Figure S2I), possibly by overly extending the distance between exon 16 and the TM2-encoding exon (Anastassiou et al., 2006; Yue et al., 2013). To test that possibility, we reduced the size of the iso-KO cassette from 561 bp to 285 bp by cutting a 276-bp fragment from the *tIstop* sequence. Strikingly, insertion of the short iso-KO cassette in [TM1] did not impair *Dscam* [TM2] expression, including both mRNA and protein expression (Figures S2D, S2G, and S2H). These studies demonstrate that the effect of an *isoTarget* cassette on off-target isoforms could

be mitigated by reducing the cassette length and found a new translational stop sequence for achieving that.

We further assessed the possibility that iso-KO cassettes introduce aberrant exons in the mRNAs. Nested PCRs were applied to enhance the detection sensitivity of possible aberrant exons between *Dscam* exon 16 and 18 in cDNA samples from larval CNS (Figure S3). No aberrant band was observed in either *Dscam*[TM1]<sup>iso-KO</sup> or *Dscam*[TM2]<sup>iso-KO</sup> (Figures S3B), suggesting that the iso-KO cassette is unlikely to introduce aberrant exons during alternative splicing.

Using reverse-transcription real-time PCR, we observed that, although iso-KO cassettes did not affect the mRNAs of the isoform that lacks the cassette, they reduced the mRNA levels of

the targeted isoform. Both the regular and short iso-KO cassettes reduced the mRNA levels of targeted *Dscam* isoforms to around 50% (Figure S3C). This is likely caused by NMD, which degrades the transcripts harboring premature termination codons after alternative splicing (Brojna and Wen, 2009; Smith and Baker, 2015). It is noteworthy that the reduction of mRNAs of the targeted isoforms does not affect the utility of iso-KO cassettes for loss-of-function studies because it also reduces the expression of the targeted isoform.

To assess the stability of the potentially truncated *Dscam* isoforms caused by the insertion of iso-KO cassettes, we performed western blotting with an antibody against an epitope in the common ectodomain of *Dscam* (Hattori et al., 2009). We did not observe any extra band around the predicated size of truncated polypeptides (180 kDa) or at other molecular weights in either iso-KO mutant (Figure S3D). These results suggest that the truncated *Dscam* proteins caused by iso-KO cassettes are unstable. Alternatively, it is possible that the translation of the targeted isoform is suppressed because of selective suppression of the translation of mRNAs containing premature termination codons (You et al., 2007).

Taken together, these results validate the use of *isoTarget* for studying endogenous *Dscam*[TM1] and [TM2] isoforms.

### Studying the Functions of *Dscam* Isoforms in Axon Terminals with *isoTarget*

We previously demonstrated that, in larval peripheral nervous system (PNS) neurons, *Dscam* instructs the presynaptic terminal growth, which is a function that is distinct from *Dscam*'s role in neurite self-avoidance (Kim et al., 2013). However, whether both *Dscam*[TM1] and [TM2] contribute to that process is unknown. With *Dscam*<sup>iso-KO</sup> larvae, we found that knocking out the [TM2] isoform impaired axon terminal growth in larval C4 da neurons (Figures 2A, 2B, and 2H). By contrast, the axonal development remained intact in *Dscam*[TM1]<sup>iso-KO</sup> larvae (Figures 2C and 2H). Next, we combined *isoTarget* with the mosaic analysis with a repressible cell marker (MARCM) technique to determine whether the *Dscam* isoforms functioned cell-autonomously to regulate C4 da axon terminal growth. Single C4 da neurons that were homozygous for *Dscam*[TM1]<sup>iso-KO</sup> had normal axon terminal growth (Figures 2D, 2E, and 2I). By contrast, loss of *Dscam*[TM2] in C4 da neurons significantly impaired axon terminal growth to the same extent as loss of *Dscam* (Figures 2F, 2G, and 2I).

Similar to C4 da neurons, whereas C3 da neurons in homozygous *Dscam*[TM1]<sup>iso-KO</sup> larvae showed normal growth of axon terminals, those in homozygous *Dscam*[TM2]<sup>iso-KO</sup> displayed dramatically reduced axon terminal growth, as evident in the gaps in longitudinal axon tracts (Figures 2J–2L). The disruption in longitudinal axon tracts was also observed in *Dscam*[TM1/2]<sup>KO</sup> larvae (Figure 2M).

These results suggest that *Dscam*[TM2], but not *Dscam*[TM1], regulates the growth of axon terminals.

### Studying the Functions of *Dscam* Isoforms in Dendrites with *isoTarget*

*Dscam* has been shown to mediate dendritic self-avoidance without affecting dendritic growth in the PNS neurons of *Drosophila* larvae (Hughes et al., 2007; Matthews et al., 2007;

Soba et al., 2007). Again, it is unknown whether both *Dscam* [TM1] and [TM2] isoforms are responsible for this process. We applied *isoTarget* to answer this question. As expected from previous studies, homozygous *Dscam*[TM1/2]<sup>iso-KO</sup> mutant larvae, which lack both [TM1] and [TM2] functions, exhibited increased dendritic crossing in both C3 da mechanosensors (Figures 3A, 3B, and 3E) and C4 da nociceptors (Figures 3A, 4B, and 4E), indicating defective avoidance among dendrites of the same neuron. Different from what we observed in axons, neither *Dscam*[TM1]<sup>iso-KO</sup> nor *Dscam*[TM2]<sup>iso-KO</sup> caused any defect in dendritic self-avoidance in these neurons (Figures 3C–3E and S4C–S4E).

We further combined MARCM with *isoTarget* to study cell-autonomous functions of targeted isoforms in single cells. Single C4 da neurons that were homozygous of *Dscam*<sup>18</sup>, which abolishes both [TM1] and [TM2] isoforms, showed a significant self-avoidance defect (Figures 3G and 3J). By contrast, loss of either *Dscam*[TM1] or [TM2] in these neurons did not cause any defect in dendritic self-avoidance (Figures 3H–3J).

The heterozygous mutants of *Dscam*<sup>iso-KO</sup>, *Dscam*[TM1]<sup>iso-KO/+</sup>, and *Dscam*[TM2]<sup>iso-KO/+</sup> did not exhibit any defect in dendritic self-avoidance or axonal growth (Figures S4F–S4L), demonstrating that these mutants are not dominant negative.

These results suggest that *Dscam*[TM1] and [TM2] function redundantly in dendritic self-avoidance. Thus, these two isoforms function differently in dendrite and axon development.

### Using *isoTarget* to Identify the Subcellular Localizations of Endogenous Protein Isoforms

Previous studies have shown that, in CNS neurons, transgenic *Dscam*[TM1] is restrained in somatodendritic compartments, whereas [TM2] is in both dendrites and axons (Wang et al., 2004; Yang et al., 2008; Zhan et al., 2004). However, transgenic *Dscam*[TM1] and [TM2] were both found to be ubiquitously present in PNS neurons (Soba et al., 2007) (Figures 6B and 6D and data not shown). Does this discrepancy indicate that the subcellular localizations of *Dscam* isoforms vary in different neuronal types? To answer that question, we applied iso-tagging to examine the subcellular localizations of endogenous *Dscam* isoforms in PNS and CNS neurons. We found that, in PNS neurons, both endogenous *Dscam*[TM1] and [TM2] were localized in the dendrites (Figures 4A–4C). Notably, different from *Dscam* transgenes, only endogenous *Dscam*[TM2] was localized in the presynaptic terminals of PNS neurons (Figures 4D and 4E). Similar isoform-specific localizations were observed in CNS neurons. By iso-tagging in larval mushroom body (MB) neurons, we observed endogenous *Dscam*[TM1] and [TM2] in the MB calyx (Figures 4F–4H), which is a cluster of dendritic branches, but only *Dscam*[TM2] in the core fibers of axonal peduncles (Figures 4I–4K). The finding that only *Dscam*[TM2] is localized in axons was further supported by the observation of *Dscam* proteins in axonal shafts that connect the PNS and CNS. In iso-tagging larvae, despite a substantial amount of *Dscam*[TM1] signals in the neuropil region of the ventral nerve cord (VNC), no [TM1] signal was observed in axonal shafts (Figures S5A and S5B). By contrast, *Dscam*[TM2] puncta were abundant in axonal shafts in global *Dscam*[TM2]<sup>iso-tagging</sup> larvae (Figure S5C). Similar results were observed in transgenic flies that expressed *Dscam*

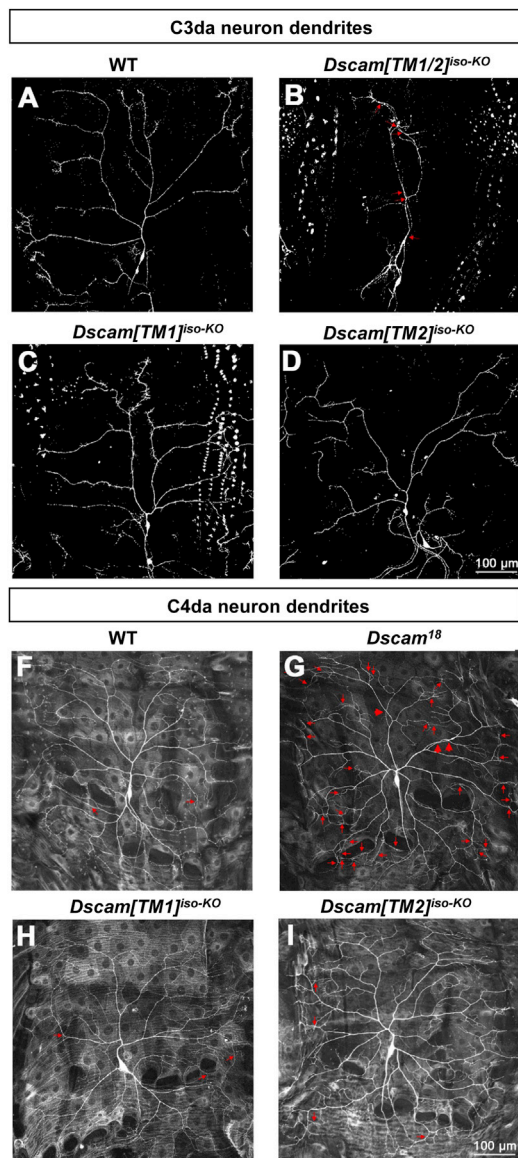

**Figure 3. IsoTarget Uncovers Redundant Functions for Dscam[TM1] and [TM2] in Dendrite Self-Avoidance**

(A–D) Dscam[TM1] and [TM2] function redundantly in mediating dendritic self-avoidance in C3 da neuron. In third-instar larvae, C3 da dendrites rarely fasciculate or intersect with each other in WT (A), whereas the loss of both *Dscam[TM1]* and *[TM2]* isoforms (*Dscam[TM1/2]<sup>iso-KO</sup>*) significantly impairs self-avoidance (B). Loss of either *Dscam[TM1]* (C) or *[TM2]* (D) does not affect dendritic self-avoidance. The red arrows point to dendritic crossing sites.

(E) Quantification of dendritic branch crossings in the C3 da neuron ddaF.

(F–I) Dscam[TM1] and [TM2] function redundantly in mediating dendritic self-avoidance in C4 da neurons. The MARCM technique was used. Small red arrows point to crossings of fine dendritic branches, and large red arrows point to crossings of major dendritic branches, which are only observed when both isoforms are lost.

(J) Quantification of dendritic branch crosses in the C4 da neuron ddaC.

See also Figure S4.

**Dendrite-Specific Localization Restrains Endogenous Dscam [TM1] from Functioning in Axons**

The studies above show that endogenous Dscam[TM1] is required for dendritic, but not axonal, development. Although this could be a result of the compartmentalized localization of Dscam[TM1] in dendrites, trans-compartmental communication has been shown for membrane proteins (Terenzio et al., 2017). It is thus essential to determine whether the dendrite-specific localization of Dscam [TM1], instead of its biochemical properties, restrains it from functioning in axons.

[TM1>::GFP or [TM2>::GFP by the endogenous *Dscam* promoter (Wang et al., 2004) (Figures S5D–S5F). Taken together, in the PNS and CNS, both endogenous Dscam[TM1] and [TM2] isoforms are present in dendrites, whereas only [TM2] is in axons.

Endogenous Dscam expression seemed to be enriched in developing, but not mature, neurons. Although both endogenous Dscam[TM1] and [TM2] were observed in PNS neurons at the early second-instar stage (Figures 4A–4C), no signal was detectable in third-instar larvae (data not shown). In larval MB, endogenous Dscam[TM2] was detected only in the core fiber, which is the axonal projections of nascent developing neurons. These observations are consistent with previous immunostaining results with an anti-Dscam antibody (Zhan et al., 2004). The discrepancies of spatiotemporal expression pattern between transgenes and endogenous Dscam isoforms underscore the importance of studying protein isoforms at the native level.

We determined whether forced localization of Dscam[TM1] in axon terminals was sufficient to rescue the axon phenotype caused by *Dscam[TM2]<sup>iso-KO</sup>*. Overexpression of a *Dscam [TM1]* transgene in C4 da neurons led to a modest level of Dscam[TM1] in axon terminals and significantly mitigated axonal growth defects caused by *Dscam[TM2]<sup>iso-KO</sup>* (Figures 5A, 5B, and 5F). As expected, two different *Dscam[TM2]* transgenes (#1 and #2, with #2 being expressed at a higher levels than #1) both caused higher levels of [TM2] in axon terminals and stronger rescue than the *Dscam[TM1]* transgene (Figures 5C and 5E–5G). Strikingly, when we used two copies of the C4-da-specific driver *ppk-Gal4* to increase the axonal level of Dscam[TM1] to that expressed by *Dscam[TM2]* transgenes, the rescue effects were comparable (Figures 5C, 5D, 5F, and 5G). By quantitatively assessing transgenic Dscam::GFP levels in C4 da axon terminals (Figure 5G), we found a strong correlation between presynaptic







Dscam isoform levels and their rescue effects (Figure 5H). These results suggest that, when localized in the same subcellular compartment, Dscam[TM1] functions equally as Dscam[TM2] in promoting axonal growth. Thus, the dendrite-specific function of endogenous Dscam[TM1] is a result of its compartmentalized localization.

### Axonally Enriched Dscam[TM2]-Dock Signaling Is Essential for the Axonal Function of Dscam[TM2]

Although the study above demonstrates that the dendrite-specific localization of Dscam[TM1] prevents it from functioning in axon development, it remains unknown whether Dscam[TM1] and [TM2] exhibit any biochemical difference that might also explain the difference in their cellular functions. To test that possibility, we took advantage of *isoTarget* to compare Dscam[TM1] and [TM2] for their interactions with functional partners. Among the molecules known to bind to the intracellular domain of Dscam and mediate its signaling (Kamiyama et al., 2015; Liu et al., 2009; Purohit et al., 2012; Schmucker et al., 2000; Sterne et al., 2015), we found that Dock, an SH2/SH3 adaptor protein that is preferentially localized in axons (Figure S6) (Desai et al., 1999; Fan et al., 2003; Hing et al., 1999), primarily associated with Dscam[TM2] in *Drosophila* larval CNS (Figure 6A). That finding was confirmed with transgenic flies that overexpress Dscam[TM1]:GFP or [TM2]:GFP through their endogenous promoters (Wang et al., 2004) (Figure 6B). Consistent with that notion, we found that Dock is required for Dscam[TM2] to promote axon terminal growth. Although overexpressing Dscam[TM2] promoted axon terminal growth in C4 da neurons, its effect was completely eliminated by the loss of *dock* (Figures 6C–6G). Interestingly, Dock bound to Dscam[TM1] and Dscam[TM2] isoforms with equal affinity in cultured Schneider 2 (S2) cells, which do not have dendrite-axon compartmentalization (Figure 6H). This result is consistent with the previous finding that the Dock-binding sites, including PxxP sites and polyproline motifs, are located in the cytoplasmic region shared by the two isoforms (Schmucker et al., 2000). In addition, the axon terminal overgrowth resulting from Dscam[TM1] overexpression was also eliminated by loss of *dock* (Figures 6I–6L). Thus, when they are in the same subcellular compartment, Dscam[TM1] and [TM2] are biochemically comparable and share the same signaling mechanism. Moreover, the ectopic localization, function, and signaling of transgenic Dscam[TM1] in axons underscore the importance of studying splicing isoforms at physiological levels of expression.

### Axonal Enrichment of Wallenda (Wnd) Compartmentalizes the Wnd-Dscam[TM2] Signaling

We showed previously that the signaling pathway involving the E3 ubiquitin ligase highwire (Hiw) and the dual leucine zipper kinase Wnd promotes Dscam expression (Kim et al., 2013). How-

ever, whether the Hiw-Wnd pathway regulates the expression of both Dscam[TM1] and [TM2] isoforms is unknown. To address that, we determined whether loss of *hiw* or overexpression of Wnd changed the levels of endogenous Dscam[TM1] and [TM2]. To test the effects of loss of *hiw*, western blotting was performed on CNS lysates from trans-heterozygous *Dscam* [TM1]:HA / [TM2]:V5 larvae that were generated through global iso-tagging. Loss of *hiw* led to increased expression of both Dscam[TM1] and [TM2] in the CNS (Figure 7A). As global overexpression of Wnd caused larval lethality, we co-expressed Wnd and R recombinase (for iso-tagging of endogenous Dscam [TM1] and [TM2]) in a subset of CNS neurons with *GAL4<sup>4-77</sup>* (Kim et al., 2013). Interestingly, Wnd overexpression only increased the level of Dscam[TM2] (Figure 7B), but not that of [TM1], suggesting that, unlike Hiw, Wnd preferentially regulates the expression of Dscam[TM2]. That finding from biochemical studies was confirmed in C4 da neurons by immunostaining of the endogenous Dscam[TM2]:V5. Immunostaining of Dscam [TM2]:V5<sup>iso-tagging</sup> showed that endogenous Dscam[TM2] was undetectable in C4 da axon terminals in third-instar larvae, but detectable at this developmental stage when Wnd was overexpressed in these neurons (Figure 7C).

Next, we investigated the mechanism underlying the differential effect of Wnd on Dscam[TM1] and [TM2]. First, we determined whether Wnd was capable of increasing Dscam[TM1] expression in a cell type without the dendrite-axon compartmentalization. We overexpressed Dscam isoforms with endogenous 5' and 3' untranslated regions (UTRs) in S2 cells and found that Wnd similarly promoted Dscam[TM1] and [TM2] expression (Figures 7D and 7E). This result suggests that Dscam[TM1] and [TM2] are molecularly indistinguishable for the Wnd regulation. Second, we identified the distribution of Wnd in neurons and found that Wnd was enriched in axons but not dendrites. A GFP-tagged kinase-dead version of Wnd (GFP-Wnd<sup>KD</sup>) (Xiong et al., 2010) was expressed in C4 da neurons; substantial signals were detected in axon terminals but not in dendrites (Figure 7F). These data suggest that axonal localization of Wnd compartmentalizes the Wnd-Dscam[TM2] signaling.

### Applying *isoTarget* to Study *Rdl* Isoforms

We tested the generality of *isoTarget* by applying it to study another gene with an exon-intron arrangement that is different from *Dscam*. The 17.1 and 17.2 exons of *Dscam* are separated by an intron of 252 bp, which is substantially shorter than that upstream of 17.1 (2,504 bp). The big size difference between the two introns flanking exon 17.1 exon might be the reason why the full-length *tstop* cassette inserted in 17.1 affected the splicing of 17.2 (Figures S2D–S2F). To test that possibility, we applied *isoTarget* to the *Rdl* gene, which encodes a *Drosophila* GABA<sub>A</sub> receptor. The length of the intron between the mutually

(F–H) Both Dscam[TM1] and [TM2] are localized in the dendrites of CNS neurons. Iso-tagging in mushroom body (MB) neurons shows that both endogenous [TM1] and [TM2] are present in the MB calyx, which is a cluster of dendrites in third-instar larvae. The MB driver OK107-Gal4 was used to drive the expression of R recombinase for tagging endogenous Dscam[TM1] or [TM2] and the expression of mCD8::RFP for labeling MB morphology.

(I–K) Dscam[TM2], but not [TM1], is localized in MB axons. Compared with the WT control, endogenous Dscam[TM2], but not [TM1], is detected in the axon peduncles of MB in third-instar larvae.

See also Figure S5.

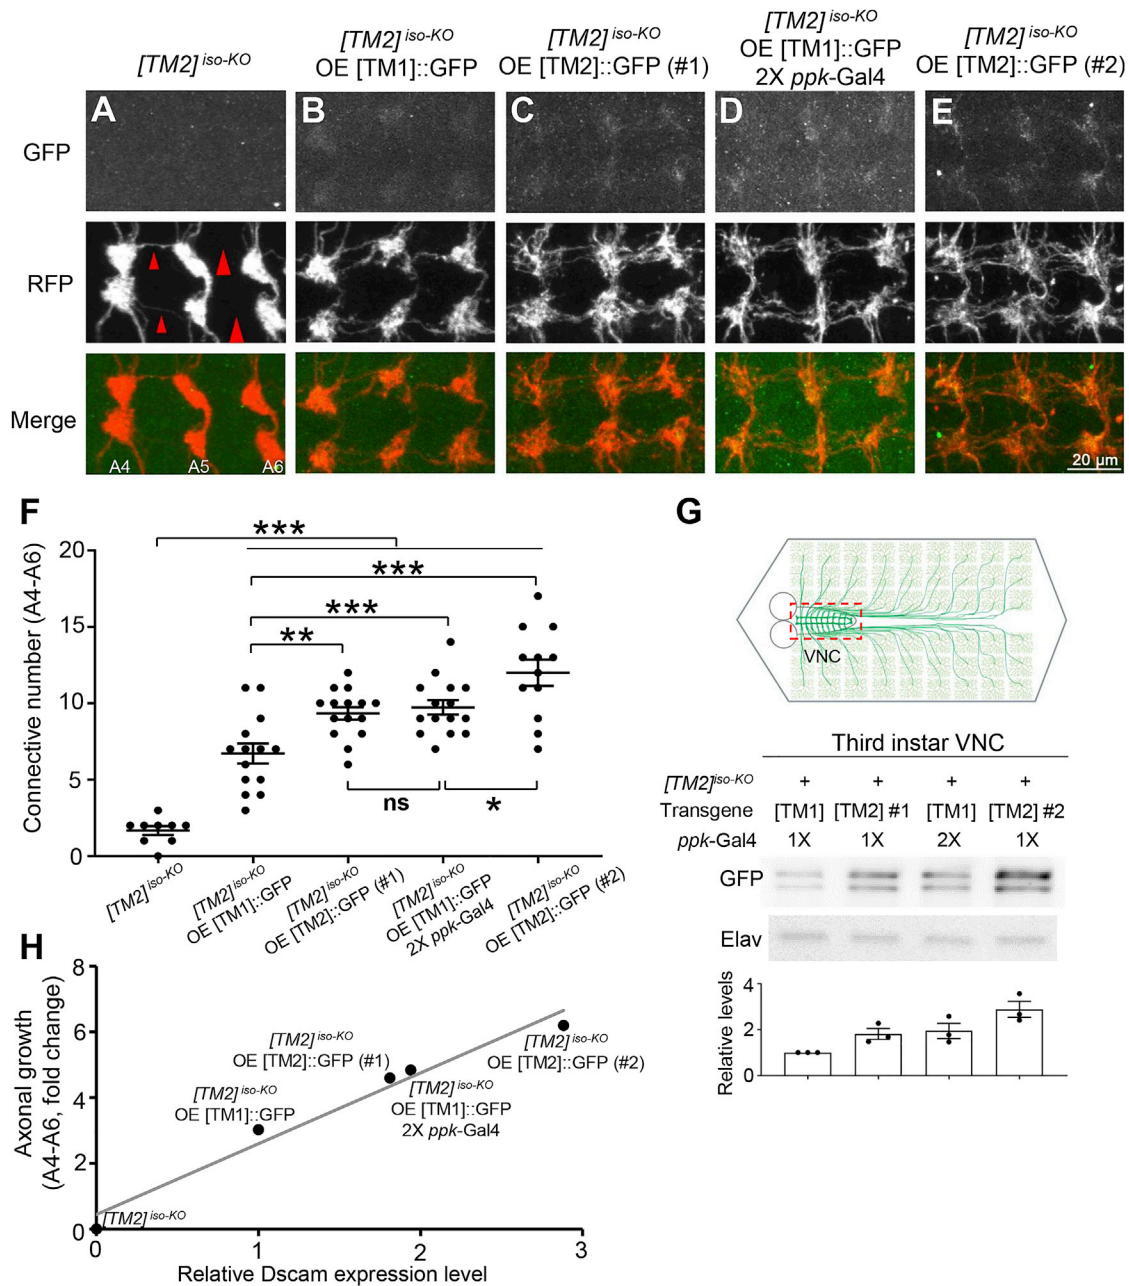

**Figure 5. Dendrite-Specific Localization Restrains Endogenous Dscam[TM1] from Functioning in Axons**

(A) *Dscam*[*TM2*]<sup>iso-KO</sup> dramatically impairs the axon terminal growth in C4 da neurons. The large red arrowheads point to the sites where longitudinal axon tracts are broken, and the small arrowheads point to where the tracts are thinned.

(B–E) Overexpression of a Dscam[TM1], Dscam[TM2]#1, or Dscam[TM2]#2 transgenes with the *ppk-Gal4* driver leads to axon localization of Dscam isoforms at different levels and mitigates the axonal defect in *Dscam*[*TM2*]<sup>iso-KO</sup> to different extents.

(F) Quantification of the number of C4 da axon connectives in segments A4–A6.

(G) Quantification of transgenic Dscam::GFP levels in C4 da axon terminals. The experiments were done in *Dscam*[*TM2*]<sup>iso-KO</sup> larvae. As shown in the schematic, UAS-Dscam::GFP transgenes were expressed in C4 da neurons with the *ppk-Gal4* driver. VNCs (indicated by the dashed red box in the top panel), which contained transgenic Dscam::GFP in C4 da axon terminals, were dissected out from third-instar larvae for western blotting.

(H) The rescue of the axonal defect caused by the loss of *Dscam* is proportional to the level of transgenic Dscam in C4 da axon terminals, regardless of the isoform. The relative Dscam expression levels were determined by western blotting of CNS lysates from larvae overexpressing [TM1]::GFP or [TM2]::GFP by *ppk-Gal4* and plotted against the rescue effect of the transgene. Linear regression,  $R^2 = 0.969$ .

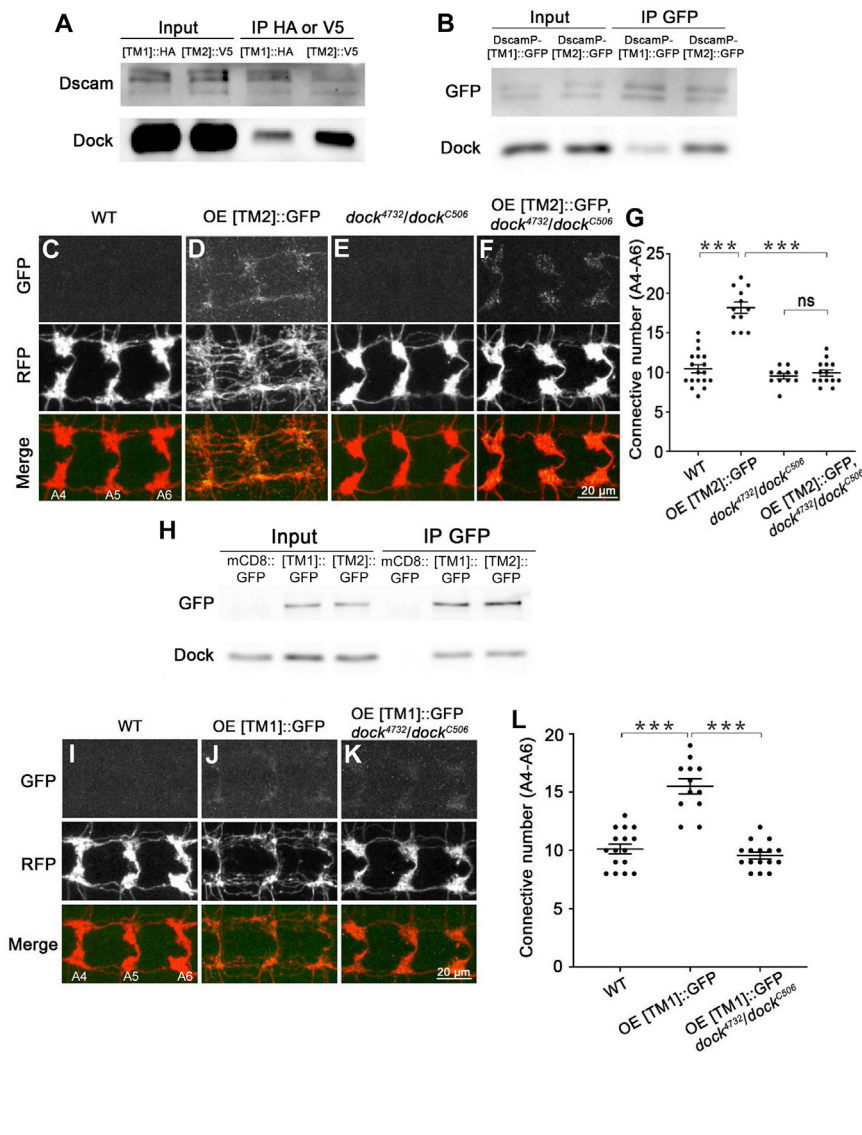

**Figure 6. Dscam[TM1] and [TM2] Exhibit Similar Biochemical Properties and Cellular Functions When They Are Localized in the Same Subcellular Compartment**

(A and B) Dock preferentially interacts with endogenous Dscam[TM2] *in vivo*. (A) Brain lysates of larvae with global iso-tagging of [TM1]::HA or [TM2]::V5 were immunoprecipitated by anti-HA or V5 beads, respectively, and immunoblotted with an anti-Dscam antibody that recognizes both [TM1] and [TM2] and an anti-Dock antibody. This experiment was repeated twice. (B) Brain lysates of larvae that expressed [TM1]::GFP or [TM2]::GFP through the endogenous *Dscam* promoter were immunoprecipitated by an anti-GFP antibody. The immunoprecipitates were immunoblotted with anti-GFP and anti-Dock antibodies. This experiment was repeated three times.

(C–F) Dscam[TM2] requires Dock to promote presynaptic terminal growth. Shown are representative images of A4–A6. Overexpressing a Dscam[TM2]::GFP transgene significantly promotes axonal growth in C4 da neurons (C) & (D). Although the loss of *dock* does not affect C4 da axon terminals (E), it completely abolishes the overgrowth caused by Dscam[TM2]::GFP overexpression (F).

(G) Quantification of the number of C4 da axon connectives.

(H) Dock binds to [TM1] and [TM2] in similar affinity in cultured S2 cells. Lysates of S2 cells expressing mCD8::GFP, Dscam[TM1]::GFP or [TM2]::GFP were immunoprecipitated with an anti-GFP antibody. Inputs and immunoprecipitates were blotted by anti-GFP and anti-Dock antibodies. This experiment was repeated three times.

(I–K) Transgenic Dscam[TM1] requires Dock to promote presynaptic terminal growth. Compared with WT (I), overexpressing [TM1]::GFP transgene significantly promotes axonal growth in C4 da neurons (J), which is completely abolished by loss of *dock* (K).

(L) Quantification of the number of C4 da axon connectives from A4–A6.

See also Figure S6.

exclusive exons, *RG* and *RF*, is 1,531 bp (Figure S7A), which is similar to that upstream of the leading exon *RG* (1,516 bp).

Computational simulation of *Drosophila* Rdl with the structure of a human GABA<sub>A</sub> receptor (Miller and Aricescu, 2014) was used to select a putative surface-exposed loop region for inserting the full-length iso-KO cassette (see STAR Method) (Figure S7B), because insertion into this region is less likely to affect Rdl isoform function. Unlike its insertion into the 17.1 exon of *Dscam* (Figure S2D), insertion of the full-length iso-KO cassette into the upstream exon *RG* did not affect the mRNA levels of the downstream *RF* isoform (Figure S7C). Moreover, as expected from what we observed of *Dscam* (Figure S2C), insertion of the full-length iso-KO cassette into the downstream *RF* exon did not affect the mRNA levels of the upstream *RG* isoform. These results suggest that whether the full-length iso-KO cassette inserted in an alternative exon affects the splicing of the downstream alternative exons depends on the intron sizes around the targeted exon. Iso-tagging of Rdl[RG] and [RF] isoforms

showed that these two isoforms exhibited similar expression patterns that were comparable with that of total Rdl proteins tagged at the C terminus with the V5-tag (Figure S7D), suggesting that iso-tagging was successful.

Consistent with what we observed in *Dscam* isoforms (Figure S3C), the iso-KO cassette reduced the mRNA levels of targeted isoforms in *Rdl* (Figure S7C). The reductions of *Rdl* isoforms (~75%) were greater than those of *Dscam* isoforms (~50%). Because the positions of premature stop codons affect the efficiency of NMD (Smith and Baker, 2015), the different extents of mRNA decays between *Rdl* and *Dscam* are possibly because the insertion sites of the iso-KO cassette is proximal to the 5' end in *Rdl* while those in *Dscam* is closer to the 3' end.

## DISCUSSION

In this study, we developed *isoTarget* to generate splicing isoform-specific loss-of-function mutants and conditional tagging



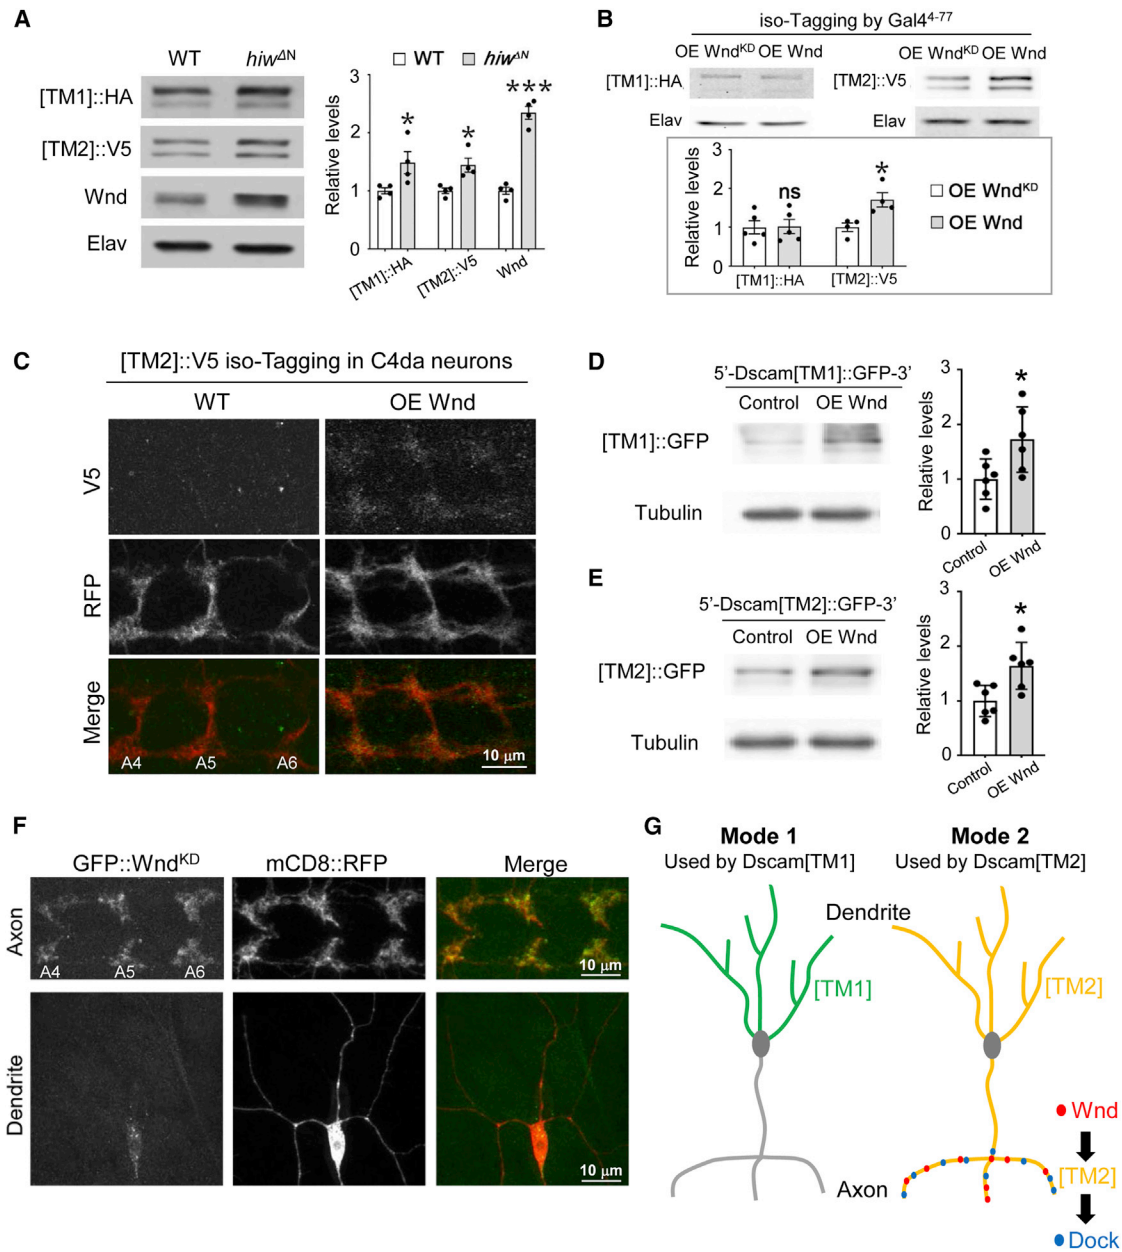

**Figure 7. Axonal Enrichment of Wnd Compartmentalizes Wnd-Dscam[TM2] Signaling**

(A) *Hiw* suppresses the expression of both *Dscam*[TM1] and [TM2]. In the brains of third-instar larvae that were trans-heterozygotes of global iso-tagging of *Dscam*[TM1]:HA and [TM2]:V5, loss of *hiw* (*hiw*<sup>ΔN</sup>) elevated the levels of both endogenous *Dscam*[TM1] and [TM2]. Left: western blots; right: quantification of western blots. Each dot represents the result of one independent experiment.

(B) Overexpression of *Wnd* increases the levels of *Dscam*[TM2], but not that of [TM1]. Top: the *Gal4*<sup>4-77</sup>, which is expressed in a small set of PNS neurons and a number of CNS neurons, was used to drive the expression of R recombinase for iso-tagging and the overexpression of *Wnd*. Each dot represents the result of one independent experiment.

(C) Overexpression of *Wnd* increases endogenous *Dscam*[TM2] levels in the presynaptic terminals of C4 da neurons. At the third-instar larval stage, *Dscam*[TM2]:V5<sup>iso-tagging</sup> is no longer detectable in C4 da axon terminals. Overexpression of *Wnd* elevates the level of *Dscam*[TM2]:V5<sup>iso-tagging</sup> in these terminals.

(D and E) *Wnd* promotes *Dscam*[TM1] and [TM2] expression to a similar extent in cultured S2 cells. S2 cells were transfected with plasmids expressing *Wnd* and *Dscam*[TM1]:GFP or [TM2]:GFP with endogenous *Dscam* 5' and 3' UTR. Lysates of S2 cells were blotted by anti-GFP and anti-tubulin antibodies. Each dot represents the result of one independent experiment.

(F) *Wnd* is enriched in axons. GFP-tagged kinase-dead *Wnd* (GFP::*Wnd*<sup>KD</sup>) was expressed in C4 da neurons by *ppk*-*Gal4*. *mCD8*::RFP was used to label the neurons. Although the GFP::*Wnd*<sup>KD</sup> signal is enriched in axon terminals, little is observed in dendrites. Yellow arrows point to major dendritic branches.

(legend continued on next page)

in specific neurons. As proofs of concept, we applied *isoTarget* to investigate isoforms of Dscam and Rdl. These findings highlight the versatility of *isoTarget* and the importance of studying splicing isoform at endogenous levels *in vivo*. In addition, they establish the causality between the subcellular localization and cellular function of two Dscam isoforms, demonstrating the critical role of subcellular localization in expanding the functional diversity of splicing isoforms. We anticipate this methodology to be useful for isoform studies in various cell types and organisms.

### Subcellular Localization Defines the Cellular Functions of Alternative Splicing Isoforms That Have the Same Biochemical Functions

Alternative isoforms often differ in their protein structures and biochemical properties (Kelemen et al., 2013). Recent studies suggest the importance of subcellular localization in defining the cellular functions of alternative splicing isoforms. For example, in cultured neurons, the RBFOX1 gene generates a nuclear variant (by excluding exon 19) that regulates RNA splicing and a cytoplasmic variant (by including exon 19) that stabilizes mRNAs (Lee et al., 2016). However, whether subcellular localization is the only reason why the nuclear and cytoplasmic variants differ in their cellular functions remains to be determined because it is possible that the two isoforms have distinct biochemical functions. More broadly, a challenging question in the field is whether the difference in subcellular localization determines the compartmentalized functions for the isoform (i.e., the issue of causality), especially at the endogenous levels *in vivo*. By applying *isoTarget* in *Drosophila* sensory neurons, we established the causality between the subcellular localization and cellular functions of two Dscam isoforms.

Even if they are localized in different subcellular compartments, splicing isoforms with the same biochemical function might not exhibit distinct cellular functions because of mechanisms such as trans-compartmental communication (Terenzio et al., 2017). To achieve cellular functions specific to a compartment, one solution is to localize the functional partners shared by the isoforms to specific subcellular compartments. Indeed, we found that the compartmental enrichment of interactors leads to isoform-specific signaling. The Dscam[TM1] and [TM2] do not differ in their biochemical interactions with Wnd and Dock (Figures 6H, 7C, and 7D). However, the axonal enrichment of Wnd and Dock forms a compartmentalized Wnd-Dscam[TM2]-Dock signaling cascade *in vivo* (Figures 7C and S6), even though Dscam[TM2] is present in both dendrites and axons (Figures 4C, 4E, 4H, and 4K). These findings suggest that, for splicing isoforms with the same biochemical functions, specific cellular functions can be achieved by the compartment-specific colocalization of the isoforms and their functional partners (Figure 7G). Taken together, our study demonstrates that Dscam isoforms use two different modes to achieve distinct compartment-specific functions *in vivo* (Figure 7G). The dendrite-specific localization restrains Dscam[TM1] from functioning in axons; and axonal

enrichment of functional partners forms a subcellular signaling pathway involving the ubiquitously distributed Dscam[TM2].

Sphingolipids are essential for the trafficking of dendritic and axonal cell adhesion molecules, including Dscam (Goyal et al., 2019). Loss of serine palmitoyltransferase (SPT), a key enzyme in sphingolipid biosynthesis, reduces the membrane localization of Dscam[TM1] and [TM2] in subsets of MB neurons, resulting in [TM1] aggregates in the soma and [TM2] aggregates in the axons. *isoTarget* would be instrumental for testing the function of sphingolipids in the trafficking of endogenous Dscam isoforms in select neuron populations. Moreover, the *isoTarget*-based approaches described in our article allowed us to address whether subcellular localization is the cause of the isoform-specific function. These approaches can also be used to determine the causality between alternations in subcellular localization (e.g., those caused by trafficking defects) and changes in cellular functions.

### Advantages of *isoTarget*

The studies reported in this article demonstrate several advantages of *isoTarget*. First, it can be used to generate classic genetic mutants for analyzing the functions of specific splicing isoforms. Second, *isoTarget* enables the identification of isoform-specific localization at the subcellular level in cells of interest *in vivo*, which is otherwise challenging because of the difficulty in discerning immunofluorescent signals in subcellular compartments among neurons expressing the same protein in the vicinity. In addition, this method expresses tagged proteins at more physiological levels than transgenes do. Third, *isoTarget* allows us to study isoform-specific compartmentalized signaling. Using *isoTarget*, we identified a Wnd-Dscam[TM2]-Dock signaling pathway enriched at the presynaptic terminals of C4 da neurons. Complementing the *in vivo* studies with *isoTarget*, we performed biochemical studies in S2 cells and found that Dscam[TM1] and [TM2] did not differ in their biochemical interactions with Wnd and Dock (Figures 6H, 7C, and 7D). Consistent with that, forced localization of ectopic Dscam[TM1] in axons also increased axonal growth *in vivo* (Figures 5A–5G) through the same downstream effector Dock used by Dscam[TM2] (Figures 6I–6L). In this series of studies, *isoTarget* was essential for establishing the cellular functions and biochemical interactions *in vivo*.

### Limitations of *isoTarget*

We see several limitations of the *isoTarget* technique. First, for the successful application of *isoTarget*, the isoform inserted with iso-KO cassette is expected to lose its function. This is not necessarily always the case, especially when the targeted exon encodes a fragment located near the C terminus of the protein. This problem is common in isoform studies by genetic modifications, including Cre-LoxP and isoEXPRESS (Gu et al., 2019). Developing an isoform-specific nanobody might be a way to solve that problem (Röth et al., 2019). Second, we

(G) Subcellular localization expands the functional diversity of splicing isoforms via two different modes. In mode 1, the localization of an isoform in a particular subcellular location (e.g., Dscam[TM1] in dendrites) restrains this isoform from functioning in other compartments. In mode 2, the enrichment of the functional partners (e.g., Wnd and Dock) for a ubiquitously localized isoform (e.g., Dscam[TM2]) leads to isoform-specific subcellular signaling and functions.

discovered that the full-length iso-KO cassette may affect the splicing of downstream alternative exons and that such effects depend on the length of the cassette (Figures S2D–S2F and S2I). Thus, the expression of isoforms other than the targeted one should always be examined by techniques such as reverse transcription real-time PCR. Moreover, whether the full-length iso-KO cassette inserted in an exon affects the splicing of downstream alternative exons depends on the sizes of the introns flanking the targeted exon (Figure S7). To minimize the chance of affecting downstream exons, we recommend using the short iso-KO cassette for *isoTarget* applications. Third, the *iso-KO* cassettes may lead to truncated polypeptides of the targeted isoform. This could be tested by western blotting with an antibody against the N-terminal part of the targeted protein. The concern that the truncated polypeptides may cause dominant-negative effects could be addressed by examining the phenotypes in heterozygotes (Figures S4F–S4L). Fourth, successful uses of *isoTarget* require that epitope tagging preserves the function of the splicing isoform. Structural information would help choose the proper inserting site. For example, inserting the *isoTarget* cassette into the loop region of a polypeptide is likely to increase the chance of success.

## STAR★METHODS

Detailed methods are provided in the online version of this paper and include the following:

- KEY RESOURCES TABLE
- RESOURCE AVAILABILITY
  - Lead Contact
  - Materials Availability
  - Data and Code Availability
- EXPERIMENTAL MODEL AND SUBJECT DETAILS
  - Animals
  - Cell lines
- METHOD DETAILS
  - Generation of DNA constructs
  - Sequences of *isoTarget* cassettes
  - Generation of *isoTarget* flies
  - S2 cell transfection
  - Co-immunoprecipitation and western blotting
  - Imaging and image analysis
  - Reverse-transcription real-Time PCR
  - Nested PCR for detecting aberrant exons in *Dscam* mRNAs
  - Computational simulation of Rdl structure
- QUANTIFICATION AND STATISTICAL ANALYSIS

## SUPPLEMENTAL INFORMATION

Supplemental Information can be found online at <https://doi.org/10.1016/j.celrep.2020.108361>.

## ACKNOWLEDGMENTS

We thank Drs. Kenneth Kwan, Ken Inoki, Yukiko Yamashita, and Dawen Cai for helpful discussions and Dr. Jung Hwan Kim for teaching H.L. and for critical

suggestions on *isoTarget* validation. We also thank Drs. Tzumin Lee, Larry Zipursky, Yi Chen, Jack Dixon, Catherine Collins, Ryan Insolera, Huey Hing, Scott Barolo, and David Lorberbaum for sharing reagents. We thank Drs. Catherine Collins, Laura Smithson, and Elizabeth Cebul for their critiques on an earlier version of the manuscript. This work was supported by grants from NIH (R01 MH112669 and R01 NS104299 to B.Y.) and the Protein Folding Disease Initiative of the University of Michigan to B.Y. and F31NS100391 and T32GM007315 to M.W.V. The content is solely the responsibility of the authors and does not necessarily represent the official views of the NIH.

## AUTHOR CONTRIBUTIONS

H.L. and B.Y. conceived the project and designed the experiments. H.L. designed, generated, and validated *isoTarget* flies, examined the functions, endogenous expression, and signaling cascade of *Dscam* isoforms. S.P., R.L., and M.W.V. performed MARCM on C4 da neurons and assisted in quantification of global iso-KO. W.Z. examined isoform functions in C3 da neurons. Y.H. assisted in generating *isoTarget* flies. L.Y. assisted in experiments of endogenous isoform expression. B.Y. supervised the project. H.L. and B.Y. wrote the paper.

## DECLARATION OF INTERESTS

The authors declare no competing interests.

Received: January 15, 2020

Revised: August 31, 2020

Accepted: October 16, 2020

Published: November 10, 2020

## REFERENCES

- Anastassiou, D., Liu, H., and Varadan, V. (2006). Variable window binding for mutually exclusive alternative splicing. *Genome Biol.* 7, R2.
- Ang, L.H., Kim, J., Stepensky, V., and Hing, H. (2003). Dock and Pak regulate olfactory axon pathfinding in *Drosophila*. *Development* 130, 1307–1316.
- Baralle, F.E., and Giudice, J. (2017). Alternative splicing as a regulator of development and tissue identity. *Nat. Rev. Mol. Cell Biol.* 18, 437–451.
- Brogna, S., and Wen, J. (2009). Nonsense-mediated mRNA decay (NMD) mechanisms. *Nat. Struct. Mol. Biol.* 16, 107–113.
- Chen, Y., Akin, O., Nern, A., Tsui, C.Y., Pecot, M.Y., and Zipursky, S.L. (2014). Cell-type-specific labeling of synapses in vivo through synaptic tagging with recombination. *Neuron* 81, 280–293.
- Collins, C.A., Wairkar, Y.P., Johnson, S.L., and DiAntonio, A. (2006). Highwire restrains synaptic growth by attenuating a MAP kinase signal. *Neuron* 51, 51–69.
- Desai, C.J., Garrity, P.A., Keshishian, H., Zipursky, S.L., and Zinn, K. (1999). The *Drosophila* SH2-SH3 adapter protein Dock is expressed in embryonic axons and facilitates synapse formation by the RP3 motoneuron. *Development* 126, 1527–1535.
- Ehrhardt, C., Schmolke, M., Matzke, A., Knoblauch, A., Will, C., Wixler, V., and Ludwig, S. (2006). Polyethylenimine, a cost-effective transfection reagent. *Signal Transduct.* 6, 179–184.
- Fan, X., Labrador, J.P., Hing, H., and Bashaw, G.J. (2003). Slit stimulation recruits Dock and Pak to the roundabout receptor and increases Rac activity to regulate axon repulsion at the CNS midline. *Neuron* 40, 113–127.
- Goyal, G., Zheng, J., Adam, E., Steffes, G., Jain, M., Klavins, K., and Hummel, T. (2019). Sphingolipid-dependent *Dscam* sorting regulates axon segregation. *Nat. Commun.* 10, 813.
- Gratz, S.J., Ukken, F.P., Rubinstein, C.D., Thiede, G., Donohue, L.K., Cummings, A.M., and O'Connor-Giles, K.M. (2014). Highly specific and efficient CRISPR/Cas9-catalyzed homology-directed repair in *Drosophila*. *Genetics* 196, 961–971.



- Grueber, W.B., and Jan, Y.N. (2004). Dendritic development: lessons from *Drosophila* and related branches. *Curr. Opin. Neurobiol.* *14*, 74–82.
- Grueber, W.B., Ye, B., Yang, C.H., Younger, S., Borden, K., Jan, L.Y., and Jan, Y.N. (2007). Projections of *Drosophila* multidendritic neurons in the central nervous system: links with peripheral dendrite morphology. *Development* *134*, 55–64.
- Gu, P., Gong, J., Shang, Y., Wang, F., Ruppell, K.T., Ma, Z., Sheehan, A.E., Freeman, M.R., and Xiang, Y. (2019). Polymodal nociception in *Drosophila* requires alternative splicing of TrpA1. *Curr. Biol.* *29*, 3961–3973.
- Hattori, D., Chen, Y., Matthews, B.J., Salwinski, L., Sabatti, C., Grueber, W.B., and Zipursky, S.L. (2009). Robust discrimination between self and non-self neurites requires thousands of Dscam1 isoforms. *Nature* *461*, 644–648.
- Hing, H., Xiao, J., Harden, N., Lim, L., and Zipursky, S.L. (1999). Pak functions downstream of Dock to regulate photoreceptor axon guidance in *Drosophila*. *Cell* *97*, 853–863.
- Hu, Y., Wang, C., Pan, G., Liu, H., Yu, G., and Ye, B. (2020). A Neural Basis for Categorizing Sensory Stimuli to Enhance Decision Accuracy. *Curr Biol* *30*. <https://doi.org/10.1016/j.cub.2020.09.045>.
- Hughes, M.E., Bortnick, R., Tsubouchi, A., Bäumer, P., Kondo, M., Uemura, T., and Schmucker, D. (2007). Homophilic Dscam interactions control complex dendrite morphogenesis. *Neuron* *54*, 417–427.
- Jan, Y.N., and Jan, L.Y. (2010). Branching out: mechanisms of dendritic arborization. *Nat. Rev. Neurosci.* *11*, 316–328.
- Kamiyama, D., McGorty, R., Kamiyama, R., Kim, M.D., Chiba, A., and Huang, B. (2015). Specification of dendritogenesis site in *Drosophila* aCC motoneuron by membrane enrichment of Pak1 through Dscam1. *Dev. Cell* *35*, 93–106.
- Kelemen, O., Convertini, P., Zhang, Z., Wen, Y., Shen, M., Falaleeva, M., and Stamm, S. (2013). Function of alternative splicing. *Gene* *514*, 1–30.
- Kim, J.H., Wang, X., Coolon, R., and Ye, B. (2013). Dscam expression levels determine presynaptic arbor sizes in *Drosophila* sensory neurons. *Neuron* *78*, 827–838.
- Lakso, M., Sauer, B., Mosinger, B., Jr., Lee, E.J., Manning, R.W., Yu, S.H., Mulder, K.L., and Westphal, H. (1992). Targeted oncogene activation by site-specific recombination in transgenic mice. *Proc. Natl. Acad. Sci. USA* *89*, 6232–6236.
- Lee, T., and Luo, L. (1999). Mosaic analysis with a repressible cell marker for studies of gene function in neuronal morphogenesis. *Neuron* *22*, 451–461.
- Lee, Y., and Rio, D.C. (2015). Mechanisms and regulation of alternative pre-mRNA splicing. *Annu. Rev. Biochem.* *84*, 291–323.
- Lee, J.A., Damianov, A., Lin, C.H., Fontes, M., Parikshak, N.N., Anderson, E.S., Geschwind, D.H., Black, D.L., and Martin, K.C. (2016). Cytoplasmic Rbfox1 regulates the expression of synaptic and autism-related genes. *Neuron* *89*, 113–128.
- Lerch, J.K., Kuo, F., Motti, D., Morris, R., Bixby, J.L., and Lemmon, V.P. (2012). Isoform diversity and regulation in peripheral and central neurons revealed through RNA-Seq. *PLoS ONE* *7*, e30417.
- Liu, G., Li, W., Wang, L., Kar, A., Guan, K.L., Rao, Y., and Wu, J.Y. (2009). DSCAM functions as a netrin receptor in commissural axon pathfinding. *Proc. Natl. Acad. Sci. USA* *106*, 2951–2956.
- Matthews, B.J., Kim, M.E., Flanagan, J.J., Hattori, D., Clemens, J.C., Zipursky, S.L., and Grueber, W.B. (2007). Dendrite self-avoidance is controlled by Dscam. *Cell* *129*, 593–604.
- Miller, P.S., and Aricescu, A.R. (2014). Crystal structure of a human GABAA receptor. *Nature* *512*, 270–275.
- Moriya, H. (2015). Quantitative nature of overexpression experiments. *Mol. Biol. Cell* *26*, 3932–3939.
- Nern, A., Pfeiffer, B.D., Svoboda, K., and Rubin, G.M. (2011). Multiple new site-specific recombinases for use in manipulating animal genomes. *Proc. Natl. Acad. Sci. USA* *108*, 14198–14203.
- Park, S.H., Cheong, C., Idoyaga, J., Kim, J.Y., Choi, J.H., Do, Y., Lee, H., Jo, J.H., Oh, Y.S., Im, W., et al. (2008). Generation and application of new rat monoclonal antibodies against synthetic FLAG and OLLAS tags for improved immunodetection. *J. Immunol. Methods* *331*, 27–38.
- Pfeiffer, B.D., Jenett, A., Hammonds, A.S., Ngo, T.T.B., Misra, S., Murphy, C., Scully, A., Carlson, J.W., Wan, K.H., Lavery, T.R., et al. (2008). Tools for neuroanatomy and neurogenetics in *Drosophila*. *Proc. Natl. Acad. Sci. USA* *105*, 9715–9720.
- Prelich, G. (2012). Gene overexpression: uses, mechanisms, and interpretation. *Genetics* *190*, 841–854.
- Purohit, A.A., Li, W., Qu, C., Dwyer, T., Shao, Q., Guan, K.L., and Liu, G. (2012). Down syndrome cell adhesion molecule (DSCAM) associates with uncoordinated-5C (UNC5C) in netrin-1-mediated growth cone collapse. *J. Biol. Chem.* *287*, 27126–27138.
- Ran, F.A., Hsu, P.D., Wright, J., Agarwala, V., Scott, D.A., and Zhang, F. (2013). Genome engineering using the CRISPR-Cas9 system. *Nat. Protoc.* *8*, 2281–2308.
- Röth, S., Fulcher, L.J., and Sapkota, G.P. (2019). Advances in targeted degradation of endogenous proteins. *Cell. Mol. Life Sci.* *76*, 2761–2777.
- Schmucker, D., Clemens, J.C., Shu, H., Worby, C.A., Xiao, J., Muda, M., Dixon, J.E., and Zipursky, S.L. (2000). *Drosophila* Dscam is an axon guidance receptor exhibiting extraordinary molecular diversity. *Cell* *101*, 671–684.
- Scotti, M.M., and Swanson, M.S. (2016). RNA mis-splicing in disease. *Nat. Rev. Genet.* *17*, 19–32.
- Shi, L., Yu, H.-H., Yang, J.S., and Lee, T. (2007). Specific *Drosophila* Dscam Juxtamembrane Variants Control Dendritic Elaboration and Axonal Arborization. *J. Neurosci* *27*, 6723–6728.
- Smith, J.E., and Baker, K.E. (2015). Nonsense-mediated RNA decay—a switch and dial for regulating gene expression. *BioEssays* *37*, 612–623.
- Soba, P., Zhu, S., Emoto, K., Younger, S., Yang, S.J., Yu, H.H., Lee, T., Jan, L.Y., and Jan, Y.N. (2007). *Drosophila* sensory neurons require Dscam for dendritic self-avoidance and proper dendritic field organization. *Neuron* *54*, 403–416.
- Sterne, G.R., Kim, J.H., and Ye, B. (2015). Dysregulated Dscam levels act through Abelson tyrosine kinase to enlarge presynaptic arbors. *eLife* *4*, e05196.
- Terenzio, M., Schiavo, G., and Fainzilber, M. (2017). Compartmentalized signaling in neurons: from cell biology to neuroscience. *Neuron* *96*, 667–679.
- Wang, J., Ma, X., Yang, J.S., Zheng, X., Zugates, C.T., Lee, C.H.J., and Lee, T. (2004). Transmembrane/juxtamembrane domain-dependent Dscam distribution and function during mushroom body neuronal morphogenesis. *Neuron* *43*, 663–672.
- Wang, J., Zugates, C.T., Liang, I.H., Lee, C.H.J., and Lee, T. (2002). *Drosophila* Dscam is required for divergent segregation of sister branches and suppresses ectopic bifurcation of axons. *Neuron* *33*, 559–571.
- Wu, C.L., Wairkar, Y.P., Collins, C.A., and DiAntonio, A. (2005). Highwire function at the *Drosophila* neuromuscular junction: Spatial, structural, and temporal requirements. *J. Neurosci* *25*, 9557–9566.
- Xiong, X., Wang, X., Ewanek, R., Bhat, P., Diantonio, A., and Collins, C.A. (2010). Protein turnover of the Wallenda/DLK kinase regulates a retrograde response to axonal injury. *J. Cell Biol.* *191*, 211–223.
- Yang, J.S.J., Bai, J.M., and Lee, T. (2008). Dynein-dynactin complex is essential for dendritic restriction of TM1-containing *Drosophila* Dscam. *PLoS ONE* *3*, e3504.
- Yap, K., and Makeyev, E.V. (2016). Functional impact of splice isoform diversity in individual cells. *Biochem. Soc. Trans.* *44*, 1079–1085.
- Ye, B., Zhang, Y., Song, W., Younger, S.H., Jan, L.Y., and Jan, Y.N. (2007). Growing dendrites and axons differ in their reliance on the secretory pathway. *Cell* *130*, 717–729.
- Ye, B., Kim, J.H., Yang, L., McLachlan, I., Younger, S., Jan, L.Y., and Jan, Y.N. (2011). Differential regulation of dendritic and axonal development by the novel Krüppel-like factor Dar1. *J. Neurosci.* *31*, 3309–3319.

You, K.T., Li, L.S., Kim, N.G., Kang, H.J., Koh, K.H., Chwae, Y.J., Kim, K.M., Kim, Y.K., Park, S.M., Jang, S.K., and Kim, H. (2007). Selective translational repression of truncated proteins from frameshift mutation-derived mRNAs in tumors. *PLoS Biol.* 5, e109.

Yuan, J.S., Reed, A., Chen, F., and Stewart, C.N., Jr. (2006). Statistical analysis of real-time PCR data. *BMC Bioinformatics* 7, 85.

Yue, Y., Yang, Y., Zhang, W., Pan, H., Chen, R., Shi, F., and Jin, Y. (2013). Regulation of Dscam exon 17 alternative splicing by steric hindrance in combination with RNA secondary structures. *RNA Biol* 10, 1822–1833.

Zhan, X.L., Clemens, J.C., Neves, G., Hattori, D., Flanagan, J.J., Hummel, T., Vasconcelos, M.L., Chess, A., and Zipursky, S.L. (2004). Analysis of Dscam diversity in regulating axon guidance in *Drosophila* mushroom bodies. *Neuron* 43, 673–686.

STAR★METHODS

KEY RESOURCES TABLE

| REAGENT or RESOURCE                                         | SOURCE                                       | IDENTIFIER        |
|-------------------------------------------------------------|----------------------------------------------|-------------------|
| <b>Antibodies</b>                                           |                                              |                   |
| rabbit anti-RFP                                             | Rockland                                     | RRID: AB_2209751  |
| mouse anti-V5                                               | Invitrogen                                   | RRID: AB_2556564  |
| chicken anti-GFP                                            | Aves Laboratories                            | RRID: AB_2307313  |
| mouse anti-GFP                                              | Invitrogen                                   | RRID: AB_221568   |
| rat anti-HA                                                 | Roche                                        | RRID: AB_390918   |
| rat anti-Elav                                               | DSHB                                         | RRID: AB_528218   |
| mouse anti-Dscam (cytoplasmic domain)                       | Shi et al., 2007                             | N/A               |
| mouse anti-Dscam (ectodomain)                               | Hattori et al., 2009                         | N/A               |
| rabbit anti-Dock                                            | Gift from Jack Dixon; Schmucker et al., 2000 | N/A               |
| rabbit anti-Wnd                                             | Collins et al., 2006                         | N/A               |
| anti-rabbit Rhodamine RX                                    | Jackson ImmunoResearch                       | RRID: AB_2340613  |
| anti-mouse Alexa Fluor 488                                  | Jackson ImmunoResearch                       | RRID: AB_2340846  |
| anti-chicken Alexa Fluor 488                                | Jackson ImmunoResearch                       | RRID: AB_2340375  |
| anti-rat Alexa Fluor 488                                    | Jackson ImmunoResearch                       | RRID: AB_2749829  |
| anti-mouse HRP                                              | Jackson ImmunoResearch                       | RRID: AB_10015289 |
| anti-rat HRP                                                | Jackson ImmunoResearch                       | RRID: AB_2338128  |
| anti-rabbit HRP                                             | Jackson ImmunoResearch                       | RRID: AB_10015282 |
| <b>Experimental Models: <i>Drosophila</i> Strains</b>       |                                              |                   |
| Dscam[TM1]-RSRT-tlstop-RSRT-HA                              | This study                                   | N/A               |
| Dscam[TM1]-RSRT-short tlstop-RSRT-HA                        | This study                                   | N/A               |
| Dscam[TM2]-RSRT-tlstop-RSRT-V5                              | This study                                   | N/A               |
| RDL[RG]-RSRT-tlstop-RSRT-V5                                 | This study                                   | N/A               |
| RDL[RF]-RSRT-tlstop-RSRT-V5                                 | This study                                   | N/A               |
| RDL-RSRT-tlstop-RSRT-V5                                     | Hu et al., 2020                              | N/A               |
| UAS-Dock-OLLAS                                              | This study                                   | N/A               |
| <i>ppk</i> -GAL4                                            | Grueber et al., 2007                         | N/A               |
| GMR83B04-GAL4                                               | Pfeiffer et al., 2008                        | N/A               |
| UAS-Dscam[TM2>::GFP (#1, 3.36.25, chromosome X)             | Wang et al., 2004                            | N/A               |
| UAS-Dscam[TM2>::GFP (#2, 3.36.25, chromosome III)           | Wang et al., 2004                            | N/A               |
| UAS-Dscam[TM1>::GFP (3.36.25, chromosome X)                 | Wang et al., 2004                            | N/A               |
| DscamP-Dscam[TM1>::GFP (3.36.25)                            | Wang et al., 2004                            | N/A               |
| DscamP-Dscam[TM2>::GFP (3.36.25)                            | Wang et al., 2004                            | N/A               |
| <i>Dscam</i> <sup>18</sup>                                  | Wang et al., 2002                            | N/A               |
| <i>hiw</i> <sup>ΔN</sup>                                    | Wu et al., 2005                              | N/A               |
| UAS-Wnd                                                     | Collins et al., 2006                         | N/A               |
| UAS- GFP-Wnd <sup>KD</sup>                                  | Xiong et al., 2010                           | N/A               |
| GAL4-OK107                                                  | Bloomington                                  | BL854             |
| <i>dock</i> <sup>C506</sup>                                 | Bloomington                                  | BL43376           |
| <i>dock</i> <sup>4732</sup>                                 | Bloomington                                  | BL10444           |
| <b>Oligonucleotides</b>                                     |                                              |                   |
| Dscam[TM1] forward primer: 5'-CGTTACCGGAGGC<br>ACTATCG-3'   | This study                                   | N/A               |
| Dscam[TM1] reverse primer: 5'- ATCGTCTTTGTGG<br>TGATTGCC-3' | This study                                   | N/A               |

(Continued on next page)



**Continued**

| REAGENT or RESOURCE                                                  | SOURCE           | IDENTIFIER      |
|----------------------------------------------------------------------|------------------|-----------------|
| Dscam[TM2] forward primer: 5'-CGTTACCGGAGG CACCATT-3'                | This study       | N/A             |
| Dscam[TM2] reverse primer: 5'-ACTACATCGTAGT ACACATCCTTT-3'           | This study       | N/A             |
| Chmp1 forward primer: 5'-AAAGGCCAAGAAGGCGATTC-3'                     | Kim et al., 2013 | N/A             |
| Chmp1 reverse primer: 5'-GGGCACTCATCCTGAGGTAGTT-3'                   | Kim et al., 2013 | N/A             |
| Elav forward primer: 5'-CTGCCAAAGACGATGACC-3'                        | Kim et al., 2013 | N/A             |
| Elav reverse primer: 5'-TAAAGCCTACTCCTTTGTC-3'                       | Kim et al., 2013 | N/A             |
| Dscam exon 16-18 forward primer 1: 5'-TCGAACAACG TG AAGCCCGATAACA-3' | This study       | N/A             |
| Dscam exon 16-18 Reverse primer 1: 5'-CCTCGCTTAATC CGGTCACAGGTA -3'  | This study       | N/A             |
| Dscam exon 16-18 forward primer 2: 5'-TGGTACAACCTC CGCATCAC-3'       | This study       | N/A             |
| Dscam exon 16-18 Reverse primer 2: 5'-TATAGTTGGATC CGGGAACGG-3'      | This study       | N/A             |
| Software and Algorithms                                              |                  |                 |
| Prism 8                                                              | GraphPad         | RRID:SCR_002798 |
| Fiji                                                                 | NIH              | RRID:SCR_002285 |
| Leica Microsystems LAS AF (version 2.6.3)                            | Leica Microscopy | RRID:SCR_008960 |
| NeuroLucida                                                          | MBF Bioscience   | RRID:SCR_001775 |
| NeuroLucida Explorer                                                 | MBF Bioscience   | RRID:SCR_017348 |

**RESOURCE AVAILABILITY**

**Lead Contact**

Further information and requests for resources and reagents should be directed to the Lead Contact, Bing Ye ([bingye@umich.edu](mailto:bingye@umich.edu)).

**Materials Availability**

The *Drosophila* lines and DNA constructs generated in this study are available from the Lead Contact upon request.

**Data and Code Availability**

The datasets generated in the study are available from the corresponding authors on reasonable request.

**EXPERIMENTAL MODEL AND SUBJECT DETAILS**

**Animals**

Male and female 2nd and 3rd-instar *Drosophila* larvae were used. Experiments were done on age-matched larvae.

**Cell lines**

S2 cells were maintained in *Drosophila* Schneider's medium supplemented with 10% heat-inactivated fetal bovine serum at 25°C in a humidified chamber.

**METHOD DETAILS**

**Generation of DNA constructs**

The design of *isoTarget* is described in Figure S1A. The translational stop cassette was amplified by PCR from non-catalytic region of lacZ with frameshift to introduce multiple premature termination codons. The loxP-dsRed-loxP sequence is described previously (Gratz et al., 2014). The *pBluescript*-based donor plasmid, which contains the *isoTarget* cassette (GS linker-RSRT-*lstop*-loxP-dsRed-loxP-RSRT-epitope-G3 linker) and *Dscam* or *Rdl* isoform homologous sequences with mutated PAM, was generated with the In-Fusion HD Cloning Kit (Clontech Laboratories, Inc.). The *pCFD3-dU63 gRNA* plasmid was used to produce gRNA in fly embryos (Ran et al., 2013). Iso-tagging of total Rdl proteins tagged at the C terminus with the V5-tag is reported in a separate paper (Hu et al., 2020). Briefly, the *isoTarget* cassette followed by the V5-epitope tag was inserted right before the *Rdl* stop codon.

The *pUAST-Dscam5'UTR-Dscam[TM1]::GFP-Dscam3'UTR* (4.3-6.36-9.25) plasmid was made by modifying *pUAST-Dscam5'UTR-Dscam[TM2]::GFP-Dscam3'UTR* (4.3-6.36-9.25) (Kim et al., 2013). Specifically, the fragment containing *Dscam5'UTR* and exons 1-16 and the fragment containing exons 18-24 plus *Dscam3'UTR* were amplified from *pUAST-Dscam5'UTR-Dscam[TM2]::GFP-Dscam3'UTR* by PCR. The fragments, together with PCR products of *Dscam* exon 17.1, were fused with the *pUASTattB* vector (linearized by EcoRV) by In-Fusion HD Cloning (Clontech Laboratories, Inc.).

To make the *pUAST-Dock-OLLAS* construct, the *Dock-OLLAS* fragment was amplified by PCR from *pBluescript-Dock* (Ang et al., 2003) with the *OLLAS* tag (Park et al., 2008) added to C terminus through a PCR primer. This fragment was then inserted into the *pUASTattB* vector by In-Fusion HD Cloning (Clontech Laboratories, Inc.).

### Sequences of isoTarget cassettes

**tlstop** (in-frame stop codons that we introduced are underlined):

TAACGTAAGCTAGCTAGACCGGTCCCAACTTAAATCGCCTTGCGACACATCCCCCTTCGCCAGCTGGCGTAATAGCGAAGAGG  
CCCGCACCGATCGCCCTTCCCAACAGTTGCGCAGCCTGAATGGCGAATGGCGCTTTCGCTGGTTCCGGCACCAGAAGCGGTG  
CCGGAAAGCTGGCTGGAGTGCATCTTCTGAGGCCGATACTGTGTCGTCCCTCAAAGTGGCAGATGCACGGTTACGATGCG  
CCCATCTACACCAAGTAACCTATCCCATTACGGTCAATCCGCCGTTTGTCCACGGAGAATCCGACGGGTTGTTACTCGCTCA  
CATTTAATGTTGATGAAAGCTGGCTACAGGAAGGCCACGCGTA

**Short tlstop** (in-frame stop codons that we introduced are underlined):

TAACGTAAGCTAGCTAGACCGGTTCCACGGAGAATCCGACGGGTTGTTACTCGCTCACATTTAATGTTGATGAAAGCTGGCT  
ACAGGAAGGCCACGCGTA

**GS-linker:** GGTGGCGGCGGAAGCGGAGGTGGAGGCTCC

**RSRT:** CTTGATGAAAGAATAACGTATTCTTCATCAAG

**loxP:** ATAACCTCGTATAATGTATGCTATACGAAGTTAT

**dsRed box** (consisting of the 3xP3 enhancer/HSP70 promoter (Gratz et al., 2014), the cDNA encoding the dsRed fluorescent protein [underlined], and the *SV40 3' UTR* [italicized])

CGTACGGGATCTAATTCAATTAGAGACTAATTCAATTAGAGCTAATTCAATTAGGATCCAAGCTTATCGATTTCCGAACCCTCGAC  
CGCCGGAGTATAAATAGAGGCGCTTCGTCTACGGAGCGACAATTCAATTCAAACAAGCAAAGTGAACACGTCGCTAAGCGAAAG  
CTAAGCAAATAAACAAGCGCAGCTGAACAAGCTAAACAATCGGCTCGAAGCCGGTCCGCCACCATGGCCTCCTCCGAGGACGTC  
ATCAAGGAGTTCATGCGCTTCAAGGTGCGCATGGAGGGCTCCGTGAACGGCCACGAGTTCGAGATCGAGGGCGAGGGCGAGG  
GCCGCCCTACGAGGGCACCCAGACCGCCAAGCTGAAGGTGACCAAGGGCGGCCCTGCCCTTCGCTGGGACATCCTGTC  
CCCCAGTTCAGTACGGCTCCAAGGTGTACGTGAAGCACCCCGGACATCCCCGACTACAAGAAGCTGTCCTCCCCGAGG  
GCTTCAAGTGGGAGCGCGTGAACCTTCGAGGACGGCGCGTGGTGACCGTGACCCAGGACTCCTCCCTCAGGACGGCTCC  
TTCATCTACAAGGTGAAGTTCATCGGCGTGAACCTCCCCCTCCGACGGCCCCGTAATGCAGAAGAAGACTATGGGCTGGGAGGCg  
TCCACCGAGCGCCTGTACCCCGCGACGGCGTGTGAAGGGCGAGATCCACAAGGCCCTGAAGCTGAAGGACGGCGGCCACT  
ACCTGGTGGAGTTCAGTCCATCTACATGGCCAAGAAGCCCGTGCAGCTGCCCGGCTACTACTACGTGGACTCCAAGCTGGACA  
TCACCTCCCACAACGAGGACTACCCATCGTGGAGCAGTACGAGCGCGCCGAGGGCCGCCACCACCTGTTCTGTAGGGGCC  
GCGACTCTAGATCATAATCAGCCATACCACATTTGTAGAGGTTTTACTTGTCTTAAAAAACCTCCCACACCTCCCCCTGAACCTGA  
AACATAAAATGAATGCAATTGTTGTTGTTAACTTGTATTGTCAGCTTATAATGGTTACAAATAAAGCAATAGCATCACAAATTTCA  
CAAATAAAGCATTTTTTCACTGCATTCTAGTTGTGGTTGTCCAAACTCATCAATGTATCTTAACCGGT

**V5:** GGCAAGCCCATCCCAAACCCACTGCTCGGCCTGGATAGCACC

**HA:** TACCCATACGATGTTCCAGATTACGCT

**OLLAS:** AGCGGCTTCGCCAACGAGCTGGGCCCCCGCTGATGGGCAAG

**G3 linker:** GGTGGCGGC

### Generation of isoTarget flies

The donor plasmid (750 ng/μl) and gRNA plasmid (250 ng/μl) were co-injected into fly embryos to generate mosaic G0 flies, which were crossed to *white*<sup>118</sup> flies to get G1 heterozygous knock-in flies that express the selection marker dsRed in their eyes. G1 flies with red fluorescence in their eyes were crossed to Cre-expressing flies (BL1092) to generate iso-KO flies. To generate global iso-Tagging flies, iso-KO flies were mated with the germline driver *nos-Gal4* (BL4442) and 20x UAS-R recombinase (BL55795). In our experience, around 20% of fertile G0 flies produced G1 flies with fluorescent red eyes. In the progeny of each G0 fly, 1%–30% of G1 were knock-in flies. To generate cell-type-specific iso-Tagging, iso-KO flies were mated with cell-type-specific Gal4 drivers, such as *ppk-Gal4*, and 20x UAS-R recombinase.

### S2 cell transfection

Plasmids were transfected into cultured S2 cells with polyethylenimine (PEI) (Ehrhardt et al., 2006). Cells were harvested for western blotting two days after transfection.

### Co-immunoprecipitation and western blotting

To perform co-immunoprecipitation with neural tissues, the CNS of 3<sup>rd</sup>-instar larvae (~120 per experimental condition) were dissected out and placed in ice-cold 1x PBS containing 2 mM sodium vanadate. After a pulse of centrifugation, larval CNS were isolated and then lysed on ice with the lysis buffer (50 mM Tris-HCl/pH 7.4, 150 mM NaCl, 2 mM sodium vanadate, 10 mM sodium fluoride, 1% Triton X-100, 10% glycerol, 10 mM imidazole and 0.5 mM phenylmethylsulfonyl fluoride). Lysates were centrifuged at 15,000 g for 20 min at 4°C. The resulting supernatants were either saved as inputs or incubated with magnetic beads conjugated with appropriate antibodies for 4 hours at 4°C. After washing once with the lysis buffer, twice with lysis buffer containing 0.1% deoxycholate, and 3 times with lysis buffer lacking Triton X-100, the immunoprecipitates and total lysates were resolved on 7.5% SDS-PAGE gels followed by western blotting as previously described (Kim et al., 2013). Protein samples were transferred to nitrocellulose membranes and detected by chemiluminescence (Catalog# 32106, Pierce ECL Western Blotting Substrate) with either a BIO-RAD ChemiDoc Touch Imaging system or a Kodak X-OMAT 2000 film processor.

The procedure of co-immunoprecipitation with lysates from S2 cells was similar except that cultured S2 cells were re-suspended in ice-cold 1x PBS before lysis.

### Imaging and image analysis

Larvae immunostaining was described previously (Ye et al., 2011). Confocal imaging was done with a Leica SP5 confocal system with 20x or 63x glycerol immersion lenses. To minimize the variation, we only imaged neuronal dendrites and presynaptic terminals of C3 da or C4 da neurons in abdominal segments 4, 5, and 6. Images were collected with z stacks of 1- $\mu$ m-step size for dendrites and 0.3- $\mu$ m-step size for axons. The resulting three-dimensional images were projected into two-dimensional images by maximum projection. The same imaging settings were applied throughout the imaging process.

The Neurolucida software was used to quantify axon terminals of single C4 da neurons. Branches shorter than 5  $\mu$ m were excluded from the analysis. For quantifying the number of longitudinal axonal branches visible between abdominal segment 4-6 (i.e., the connectives) of C4 da neurons, only complete connectives spanning neighboring segments were quantified. Fasciculated connectives were counted as two.

To eliminate experimenter's bias, these experiments were carried out in double-blind fashion. The images acquired by the primary experimenter were coded and randomized by another lab member. After the primary experimenter quantified the data, the data were decoded for statistical analysis.

### Reverse-transcription real-Time PCR

The procedure was as described before (Kim et al., 2013). Briefly, mRNA was extracted from around 20 3<sup>rd</sup>-instar larval CNS with a TRIzol method by following manufacturer's guide (Invitrogen). cDNA was synthesized with Invitrogen SuperScript III First-Strand Synthesis SuperMix (Invitrogen). 10 ng cDNA was used as the template for each real-time PCR reaction by SYBR Green mix (Thermo Scientific) with the Applied Biosystems QuantStudio 6 Flex. To normalize *Dscam* transcripts to those of reference genes, we calculated  $\Delta$ Ct (*Dscam*) = Ct (*Dscam*) – Ct (reference gene). Statistical analysis was performed to compare  $\Delta$ Ct (*Dscam*)(wild-type) and  $\Delta$ Ct (*Dscam*)(mutant) to determine whether there is the expression of test gene is different between wild-type and mutants (Yuan et al., 2006). Relative mRNA levels are calculated as:  $2^{-\Delta\Delta$ Ct}, where  $\Delta\Delta$ Ct (*Dscam*) =  $\Delta$ Ct (*Dscam*)(mutant) –  $\Delta$ Ct (*Dscam*)(wild-type). We used *elav* as the reference gene and *Chmp1* as the internal control. Following primers were used: *Chmp1*: 5'-AAAGGC CAAGAAGGCGATTTC-3' and 5'-GGGCACTCATCCTGAGGTAGTT-3'; *elav*: 5'-CTGCCAAAGACGATGACC-3' and 5'-TAAAGCC TACTCCTTTTCGTC-3'; *Dscam*[*TM1*]: 5'- CGTTACCGGAGGCACTATCG-3' and 5'- ATCGTCTTTGTGGTGA TTGCC-3'; *Dscam* [*TM2*]: 5'- CGTTACCGGAGGACCATT-3' and 5'- ACTACATCG TAGTACACATCCTTT-3'.

### Nested PCR for detecting aberrant exons in *Dscam* mRNAs

To detect potential aberrant exons between exon 16 and 18 in *Dscam* mRNAs, 10 ng of cDNA from 3<sup>rd</sup> instar larval CNS of desired genotypes was used as the templates for nested PCR. Primers F1 and R1 were used for the first round of amplification of the cDNA. Subsequently, 1  $\mu$ L of the PCR products from the first round were used as the templates for the second round of PCR with primers F2 and R2. The primer sequences are: F1: 5'-TCGAACAACG TGAAGCCCCGATAACA-3'; R1: 5'-CCTCGCTTAATCCGGTCACAGGTA –3'; F2: 5'-TGGTACAACCTCCGCATCAC-3'; R2: 5'-TATAGTTGGATCCGGGAACGG-3'.

### Computational simulation of Rdl structure

PyMOL was used to simulate protein structures (The PyMOL Molecular Graphics System, Version 2.0, Schrödinger LLC). To predict the structures of Rdl isoforms, the amino acid sequences of RG and RF were aligned with that of the human  $\beta$ 3 GABA<sub>A</sub> receptor, whose crystal structure has been resolved (Miller and Aricescu, 2014). We then selected the insertion sites of the epitope-tags within a predicted surface-exposed loop.



#### QUANTIFICATION AND STATISTICAL ANALYSIS

Data are presented as mean  $\pm$  SEM. Comparisons among multiple groups were performed by One-way ANOVA followed by Student's t test. Comparisons between two groups were done by Student's t test. Linear regression was used in [Figure 5H](#).  $p < 0.05$  was considered to be statistically significant. For all quantification, \* $p < 0.05$ ; \*\* $p < 0.01$ ; \*\*\* $p < 0.001$ ; ns: not significant ( $p > 0.05$ ).

Cell Reports, Volume 33

## Supplemental Information

***isoTarget*: A Genetic Method  
for Analyzing the Functional Diversity  
of Splicing Isoforms *In Vivo***

Hao Liu, Sarah Pizzano, Ruonan Li, Wenquan Zhao, Macy W. Veling, Yujia Hu, Limin Yang, and Bing Ye

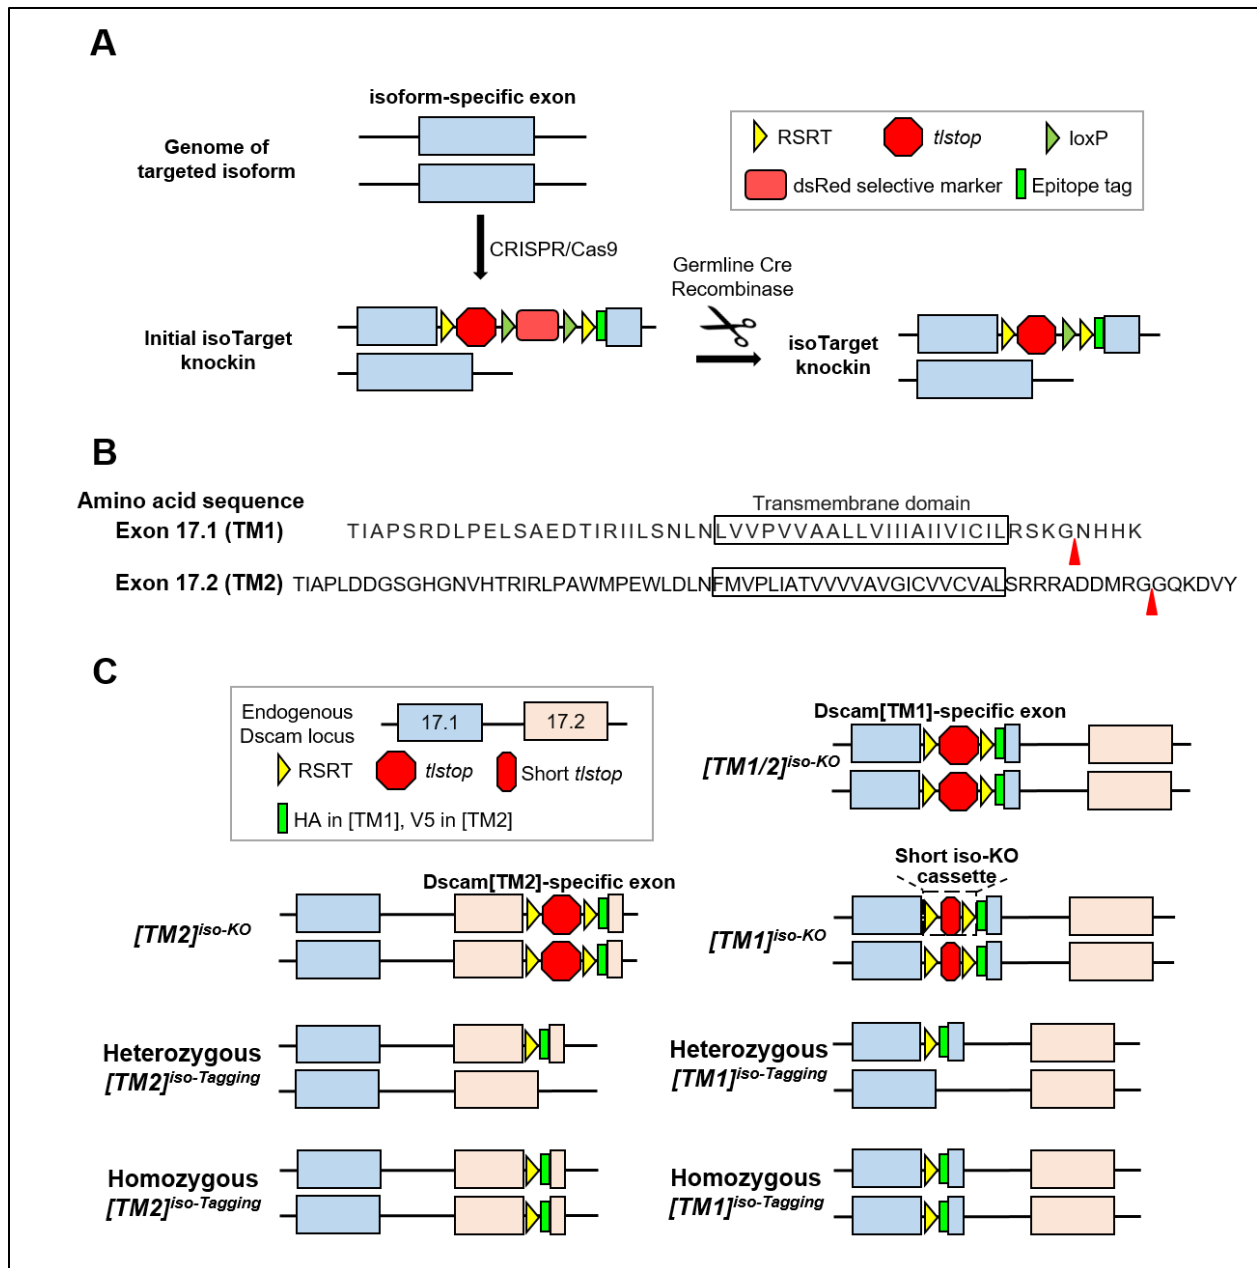

**Figure S1. The design of the *isoTarget* cassette. (Related to Figure 1)**

(A) At the core of the cassette is the *t/stop* box that contains multiple termination codons to ensure the disruption of mRNA translation. The *t/stop* is flanked by two RSRT sites followed by an epitope tag for achieving cell-type-specific labeling of targeted isoforms through inducible site-specific recombination. To facilitate the screening of animals with successful integrations of the *isoTarget* cassette, a transgene expressing dsRed under the 3xP3 enhancer/Hsp70 promoter is inserted in between the *t/stop* and the second

RSRT site. The dsRed transgene is flanked by two loxP sites, allowing the removal of the dsRed in the presence of Cre recombinase. The *isoTarget* cassette can be knocked into the exon encoding the targeted isoform by CRISPR/Cas9.

**(B)** The *isoTarget* insertion sites in *Dscam*[TM1] and [TM2] isoforms. Shown are the amino acid sequences encoded by the 17.1 (TM1) and 17.2 (TM2) exons. Red arrowheads indicate the insertion sites in the juxtamembrane regions.

**(C)** Applying *isoTarget* to study *Dscam* isoforms. As shown later, iso-KO of *Dscam*[TM1] impairs both *Dscam*[TM1] and [TM2] expression and is thus named *Dscam*[TM1/2]<sup>iso-KO</sup>. We created a short *t/stop* cassette (“short iso-KO”) that specifically knocks out [TM1], but not [TM2]. Iso-Tagging of *Dscam*[TM1] does not affect [TM1] functions. Iso-KO of [TM2] only abolishes *Dscam*[TM2] functions, and iso-Tagging of *Dscam*[TM2] does not affect [TM2] functions. Depending on the purpose of the experiment, *Dscam*[TM1] and [TM2] can be tagged either globally or specifically in targeted cell types.



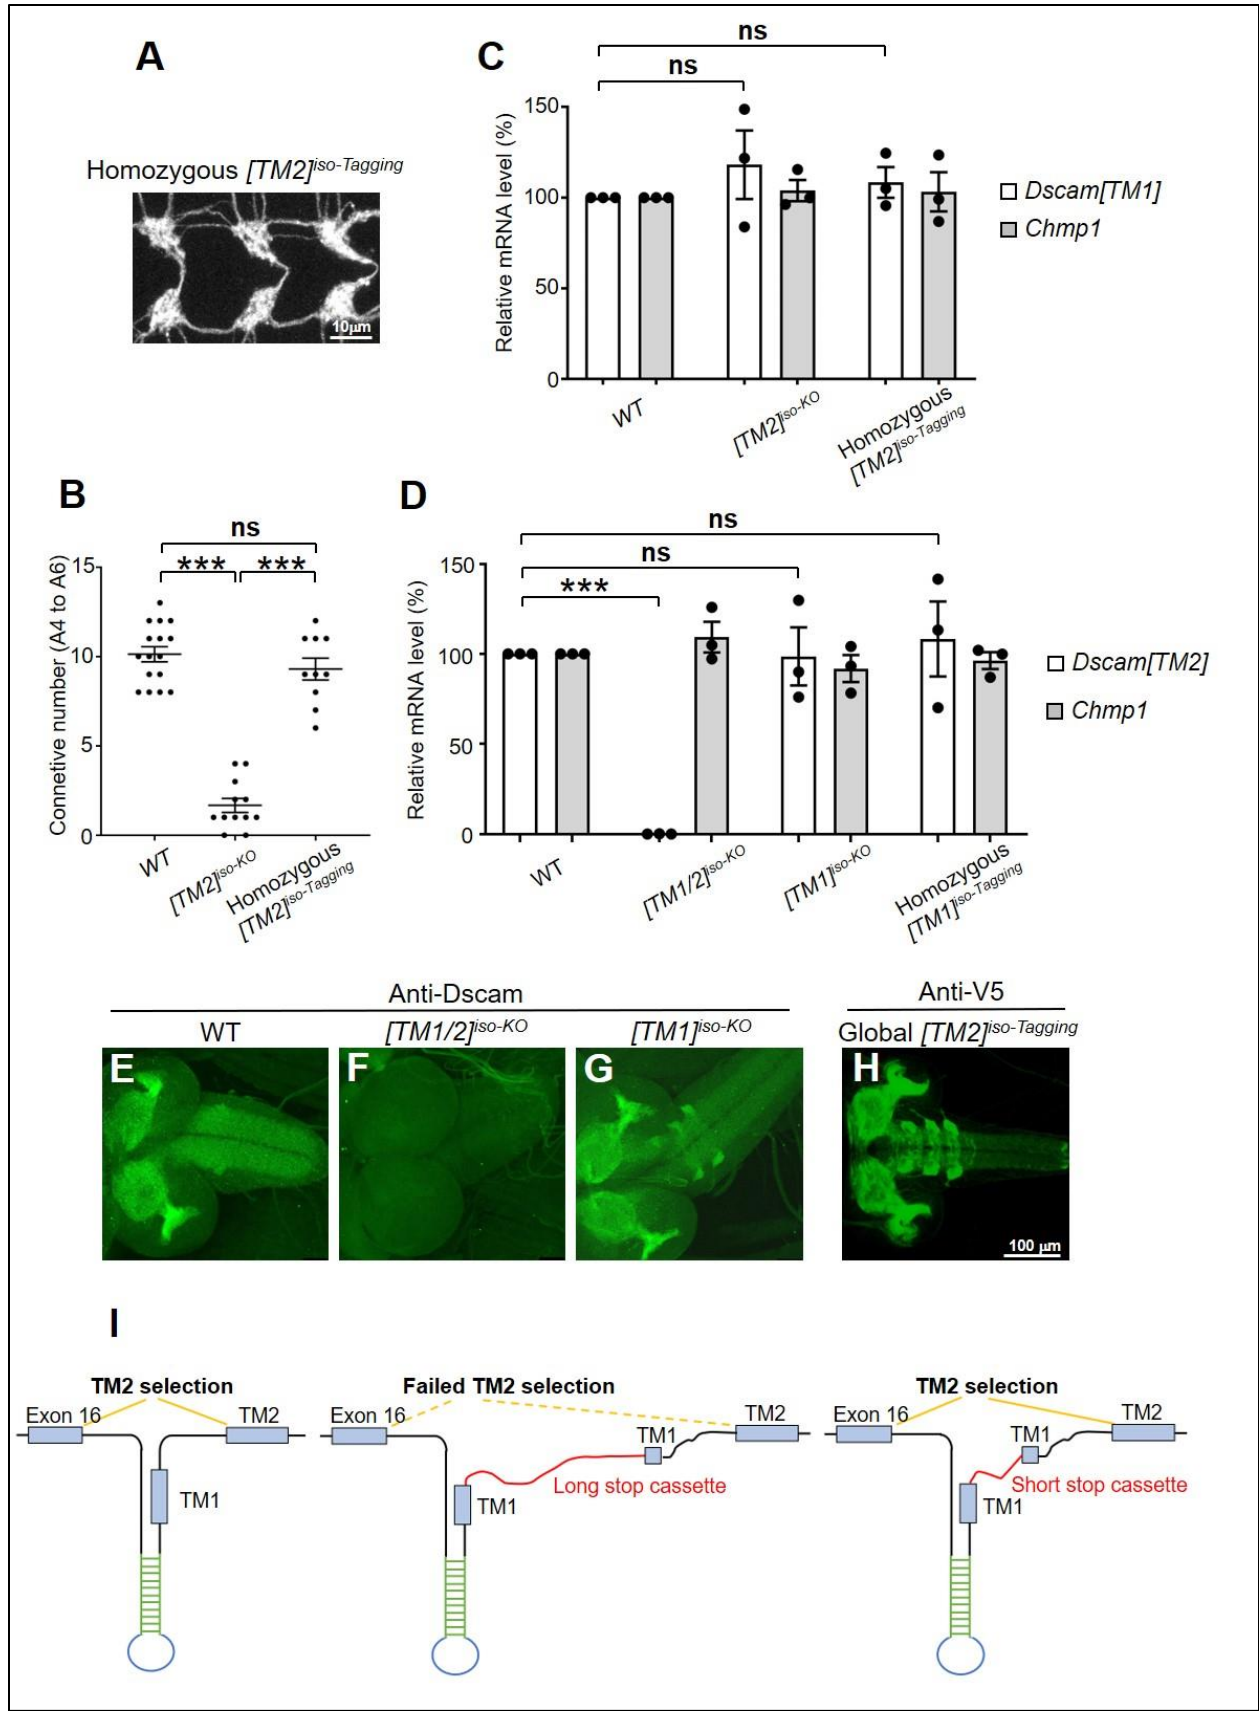

**Figure S2. Validation of *isoTarget* and the discovery of the short *tlstop* cassette. (Related to Figure 1 and 2A-B)**

(A) *Dscam*[*TM2*]<sup>*iso-Tagging*</sup> does not affect *Dscam*[*TM2*] functions. As shown in Figure 2A and B, [*TM2*]<sup>*iso-KO*</sup> impairs axon terminal growth in C4da neurons. The axonal defect is completely rescued in homozygous global [*TM2*]<sup>*iso-Tagging*</sup> larvae generated by excision of the RSRT-*tlstop*-RSRT box from the *iso-KO*. Shown are the C4da axon terminals in A4-A6 segments.

(B) Quantification of the number of C4da axon connectives.

(C) Neither global [*TM2*]<sup>*iso-KO*</sup> nor homozygous global [*TM2*]<sup>*iso-Tagging*</sup> affect the mRNA levels of *Dscam*[*TM1*]. mRNAs from the whole CNS of 3<sup>rd</sup> instar larvae were used for reverse-transcription real-time PCR. The  $\Delta$ Ct value of *Dscam*[*TM2*] mRNA is normalized to that of the *elav* gene as described in the Experimental Procedure. *Chmp1* serves as the internal control. Each dot represents one independent experiment.

(D) *Dscam*[*TM2*] mRNA is undetectable in global *Dscam*[*TM1*] *isoTarget* flies resulted from the insertion of the original long *tlstop* cassette ([*TM1/2*]<sup>*iso-KO*</sup>), but remains intact in global *Dscam*[*TM1*] *isoTarget* flies generated by the insertion of the short *tlstop* cassette ([*TM1*]<sup>*iso-KO*</sup>). *Dscam*[*TM2*] mRNA level is not affected in homozygous global [*TM1*]<sup>*iso-Tagging*</sup> larvae. mRNAs from the whole CNS of 3<sup>rd</sup> instar larvae were used for reverse-transcription real-time PCR.

(E-H) Immunostaining of the CNS with an anti-*Dscam* antibody shows that while *Dscam* expression is abolished in global *Dscam*[*TM1/2*]<sup>*iso-KO*</sup> (F), it is detectable in global *Dscam*[*TM1*]<sup>*iso-KO*</sup> (G). Moreover, the *Dscam* expression pattern in *Dscam*[*TM1*]<sup>*iso-KO*</sup>, which is presumably *Dscam*[*TM2*], is similar to endogenous *Dscam*[*TM2*] labeled by global *Dscam*[*TM2*]<sup>*iso-Tagging*</sup> (H).

(I) A schematic model of exon 17 selection from *Dscam* pre-mRNA, based on a previous study (Anastassiou et al., 2006). The complementary sequences (green) form a stem-loop, which is required for the selection of the *TM2* exon (17.2) into *Dscam* mRNA. Inserting a long cassette into the *TM1* exon (17.1) may create a long distance that eliminates the *TM2* exon selection.

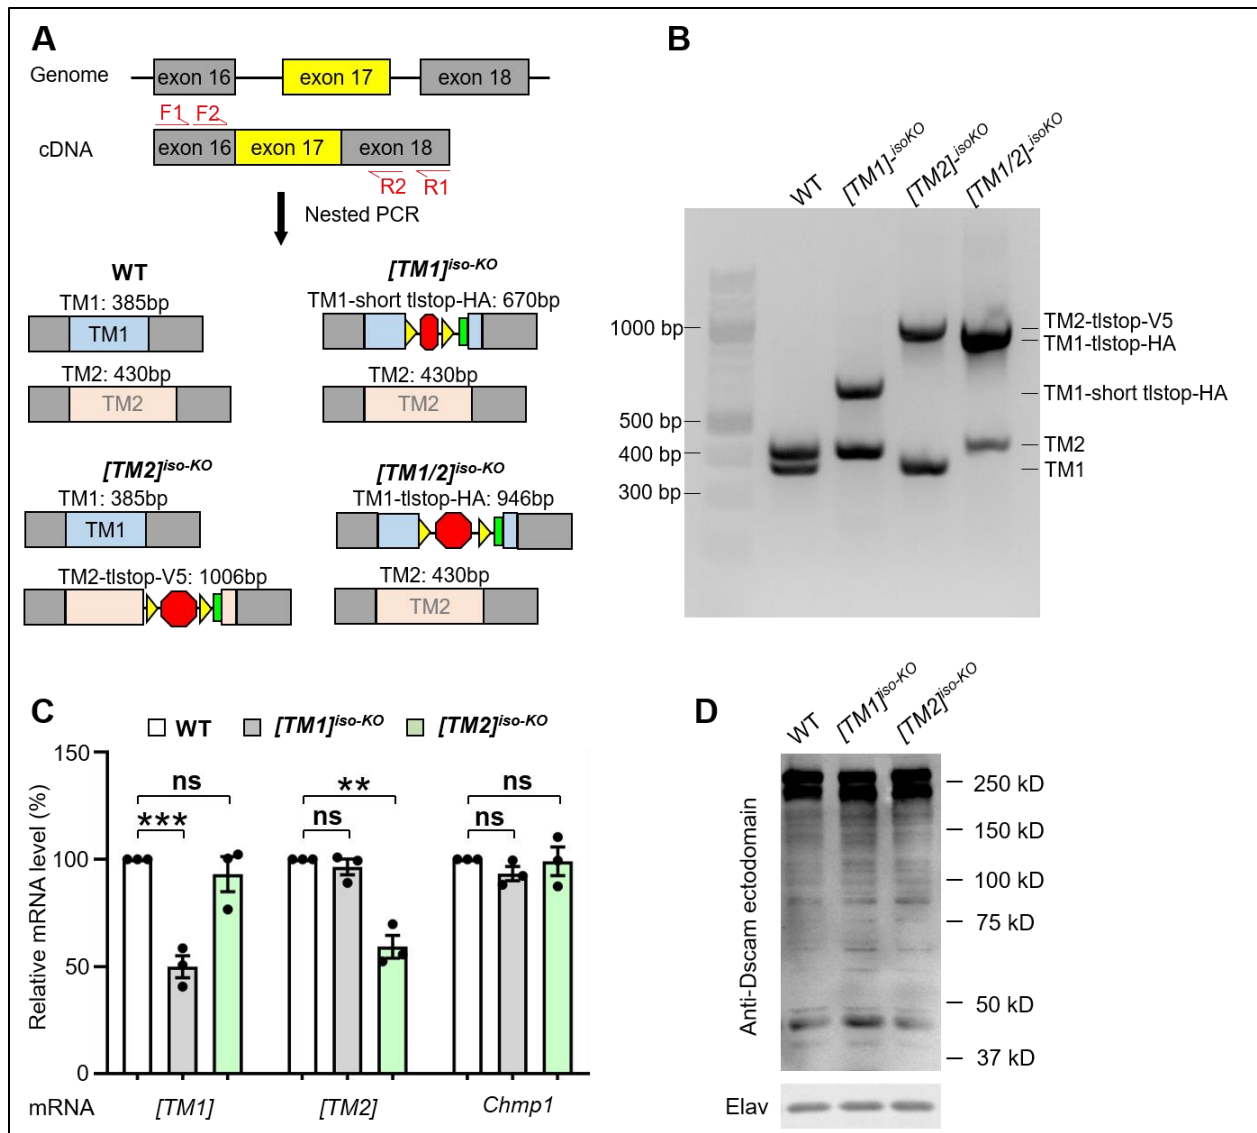

**Figure S3. The effect of *isoTarget* cassettes on alternative splicing, mRNA and protein expression of targeted isoforms. (Related to Figure 1B)**

(A-B) *isoTarget* cassettes do not introduce aberrant exons during alternative splicing.

(A) Scheme of nested PCRs to detect the splicing variants between exon 16 and 18 in the *Dscam* gene in wild-type (WT), *Dscam*[*TM1*]<sup>iso-KO</sup>, *Dscam*[*TM2*]<sup>iso-KO</sup>, and *Dscam*[*TM1/2*]<sup>iso-KO</sup>. The WT cDNAs are expected to produce the 385-bp TM1 and 430-bp TM2 bands. The *Dscam*[*TM1*]<sup>iso-KO</sup> cDNAs should produce a TM2 band (430 bp) and an altered TM1 band that contains the short iso-KO cassette (670 bp). The *Dscam*[*TM2*]<sup>iso-KO</sup> cDNAs should produce a TM1 band (385 bp) and an altered TM2

band that contains the regular iso-KO cassette (1006 bp). *Dscam*[*TM1/2*]<sup>iso-KO</sup> was used as a positive control for the assay sensitivity, as it abolishes over 99% of *Dscam*[*TM2*] mRNA (Figure S3A). See STAR Method for the sequences of PCR primers.

**(B)** No aberrant exon was observed in *iso-KO* mutants of *Dscam*. A dim, yet clear, 430-bp *Dscam*[*TM2*] band was seen in *Dscam*[*TM1/2*]<sup>iso-KO</sup>, demonstrating the high sensitivity of the PCR assay.

**(C)** *isoTarget* cassettes reduce the mRNA levels of targeted isoforms. mRNAs from the whole CNS of 3<sup>rd</sup> instar larvae were used for reverse-transcription real-time PCR.

**(D)** Western blotting with an antibody against a common ectodomain epitope of *Dscam*. No band was observed at the expected size of truncated polypeptides resulting from insertion of iso-KO cassettes (~180 kD) or at other molecular weights in iso-KO mutants.



C4da neuron dendrites

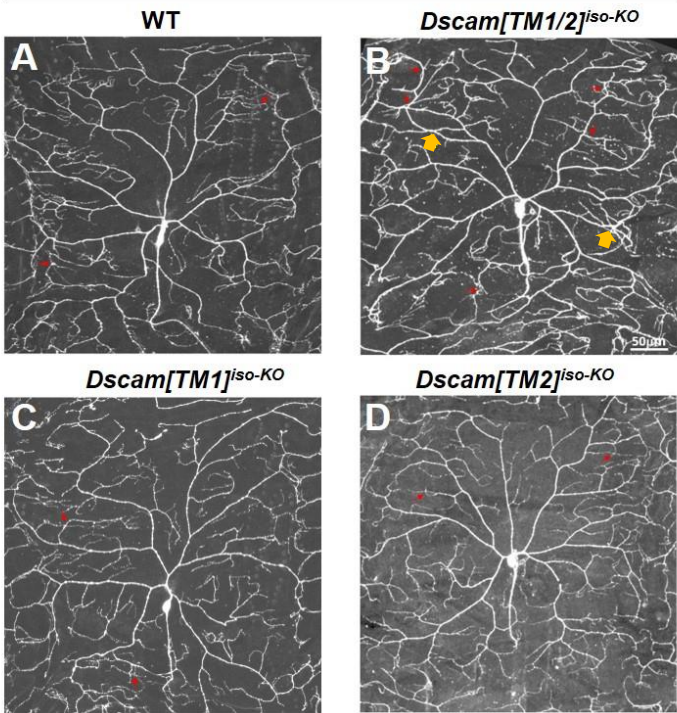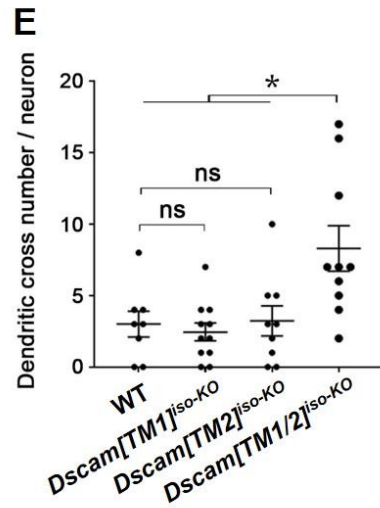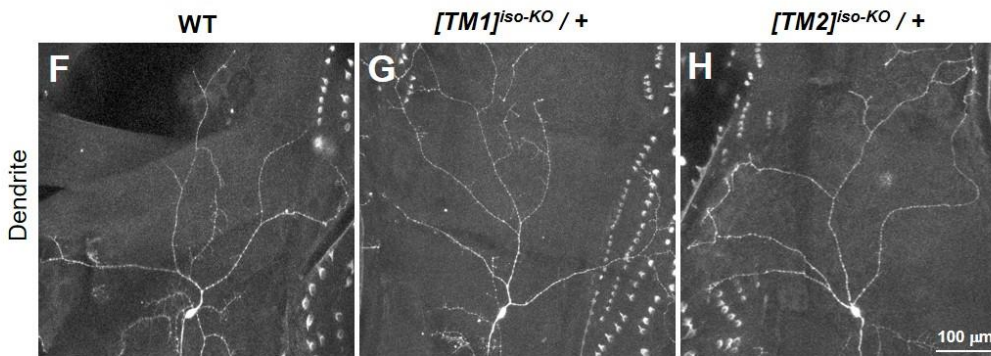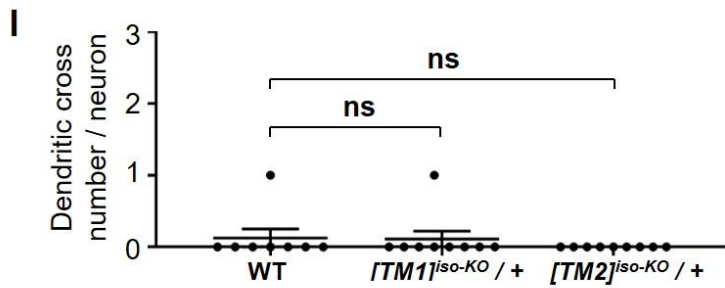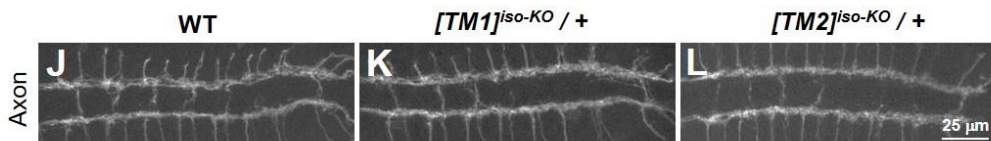

**Figure S4. *Dscam*[*TM1*] and [*TM2*] function redundantly in mediating dendritic self-avoidance in C4da neurons. (Related to Figure 3)**

(A-D) While *Dscam*[*TM1/2*]<sup>*iso-KO*</sup> (B) increases the crossing of dendritic branches in C4da neurons in 3<sup>rd</sup> instar larvae, neither *Dscam*[*TM1*]<sup>*iso-KO*</sup> nor *Dscam*[*TM2*]<sup>*iso-KO*</sup> impairs dendritic self-avoidance (C & D). Small red arrows point to crossings of fine dendritic branches, and large yellow arrows point to crossings of major dendritic branches, which is only observed when both isoforms are lost.

(E) Quantification of dendritic branch crosses in the C4da neuron ddaC.

(F-L) *Dscam*<sup>*iso-KO*</sup> mutants are not dominant negative. Compared with WT (F), no dendritic self-avoidance is observed in heterozygotes of *Dscam*[*TM1*]<sup>*iso-KO/+*</sup> (G) or *Dscam*[*TM2*]<sup>*iso-KO/+*</sup> (H). Quantification of dendritic branch crossings in the C3da neuron ddaF is shown in (I). Compared with WT (J), no axonal growth defect is observed in C3da neurons in larvae that are *Dscam*[*TM1*]<sup>*iso-KO/+*</sup> (K) or *Dscam*[*TM2*]<sup>*iso-KO/+*</sup> (L).

Sample numbers (neurons) for F-H: WT, 8; *Dscam*[*TM1*]<sup>*iso-KO/+*</sup>, 9; *Dscam*[*TM2*]<sup>*iso-KO/+*</sup>, 9. Sample numbers (VNCs) for J-L: WT, 7; *Dscam*[*TM1*]<sup>*iso-KO/+*</sup>, 7; *Dscam*[*TM2*]<sup>*iso-KO/+*</sup>, 8.

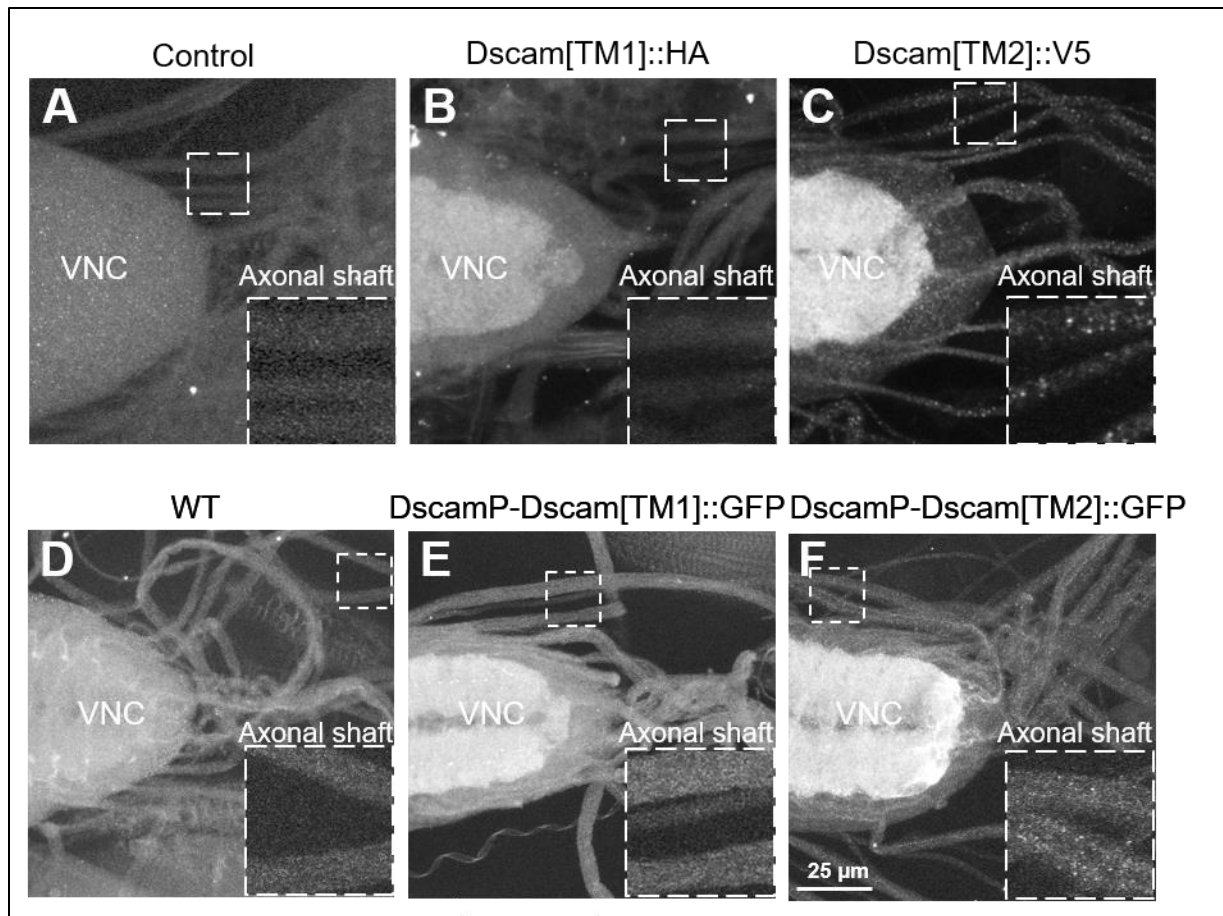

**Figure S5. Endogenous Dscam[TM2], but not [TM1], is localized in axons connecting the CNS and PNS. (related to Figure 4)**

(A-C) Endogenous Dscam[TM1] (*Dscam[TM1]::HA<sup>iso-Tagging</sup>*) is observed in VNC neuropil region, but not in axonal shafts. By contrast, endogenous Dscam[TM2] (*Dscam[TM2]::V5<sup>iso-Tagging</sup>*) is localized in axon shafts besides the VNC neuropil. The insets are magnified views of the boxed regions.

(D-F) Transgenic Dscam[TM1]::GFP expressed by the endogenous *Dscam* promoter is observed in VNC neuropil region, but not in axonal shafts. By contrast, puncta of transgenic Dscam[TM2]::GFP expressed by the endogenous *Dscam* promoter are localized in axon shafts besides the VNC neuropil.

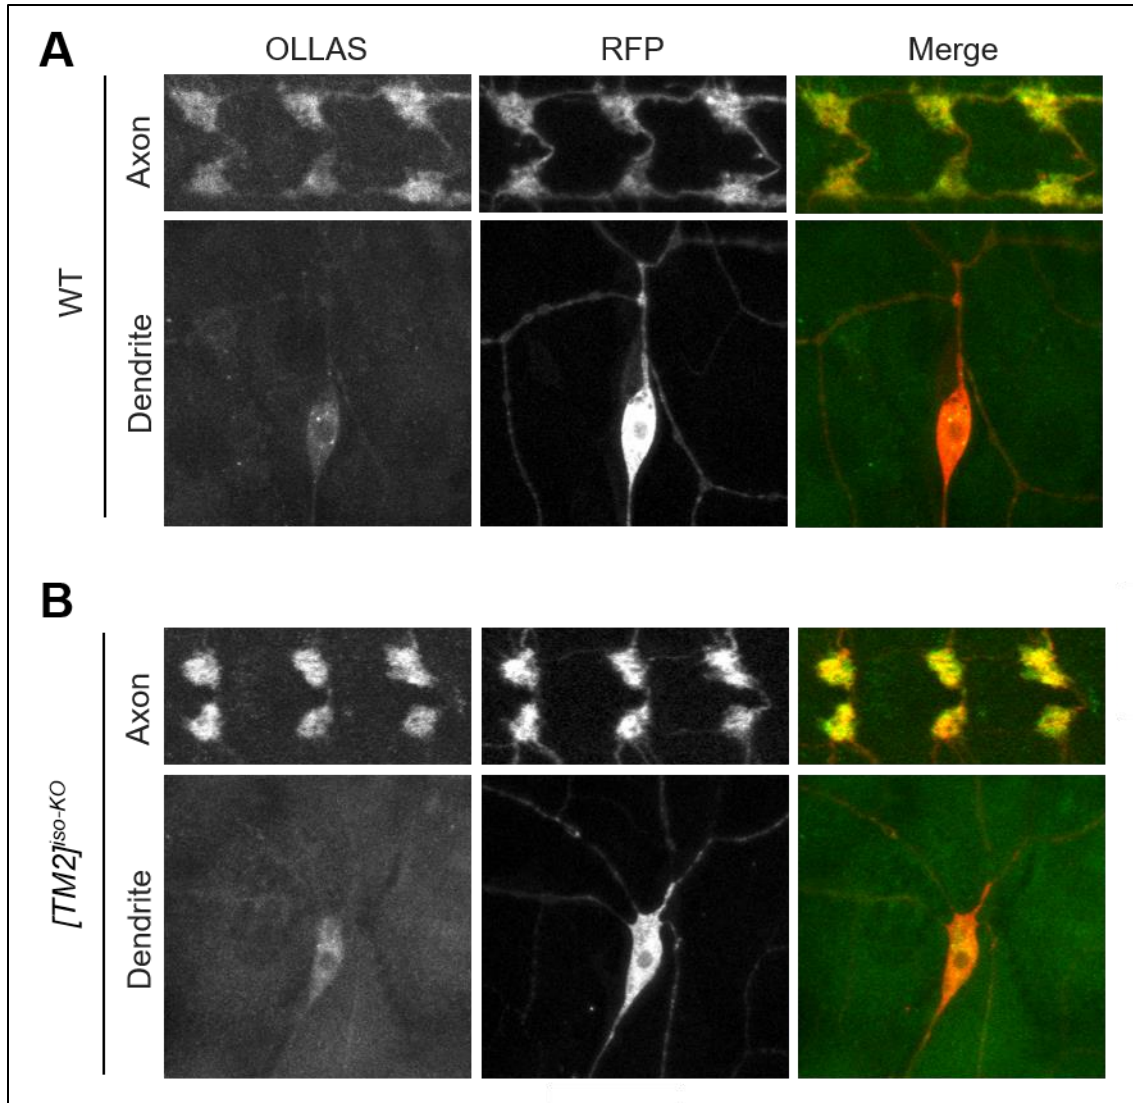

**Figure S6. Dock is enriched in axons in both wild-type and *Dscam*[*TM2*]<sup>iso-KO</sup>. (related to Figure 6)**

(A) Dock is enriched in axons in WT C4da neurons. OLLAS-tagged Dock (Dock::OLLAS) was expressed in C4da neurons by *ppk*-Gal4. mCD8::RFP was used to label the neurons. While Dock::OLLAS is enriched in axon terminals, little is observed in dendrites.

(B) Dock is also enriched in axons in *Dscam*[*TM2*]<sup>iso-KO</sup>



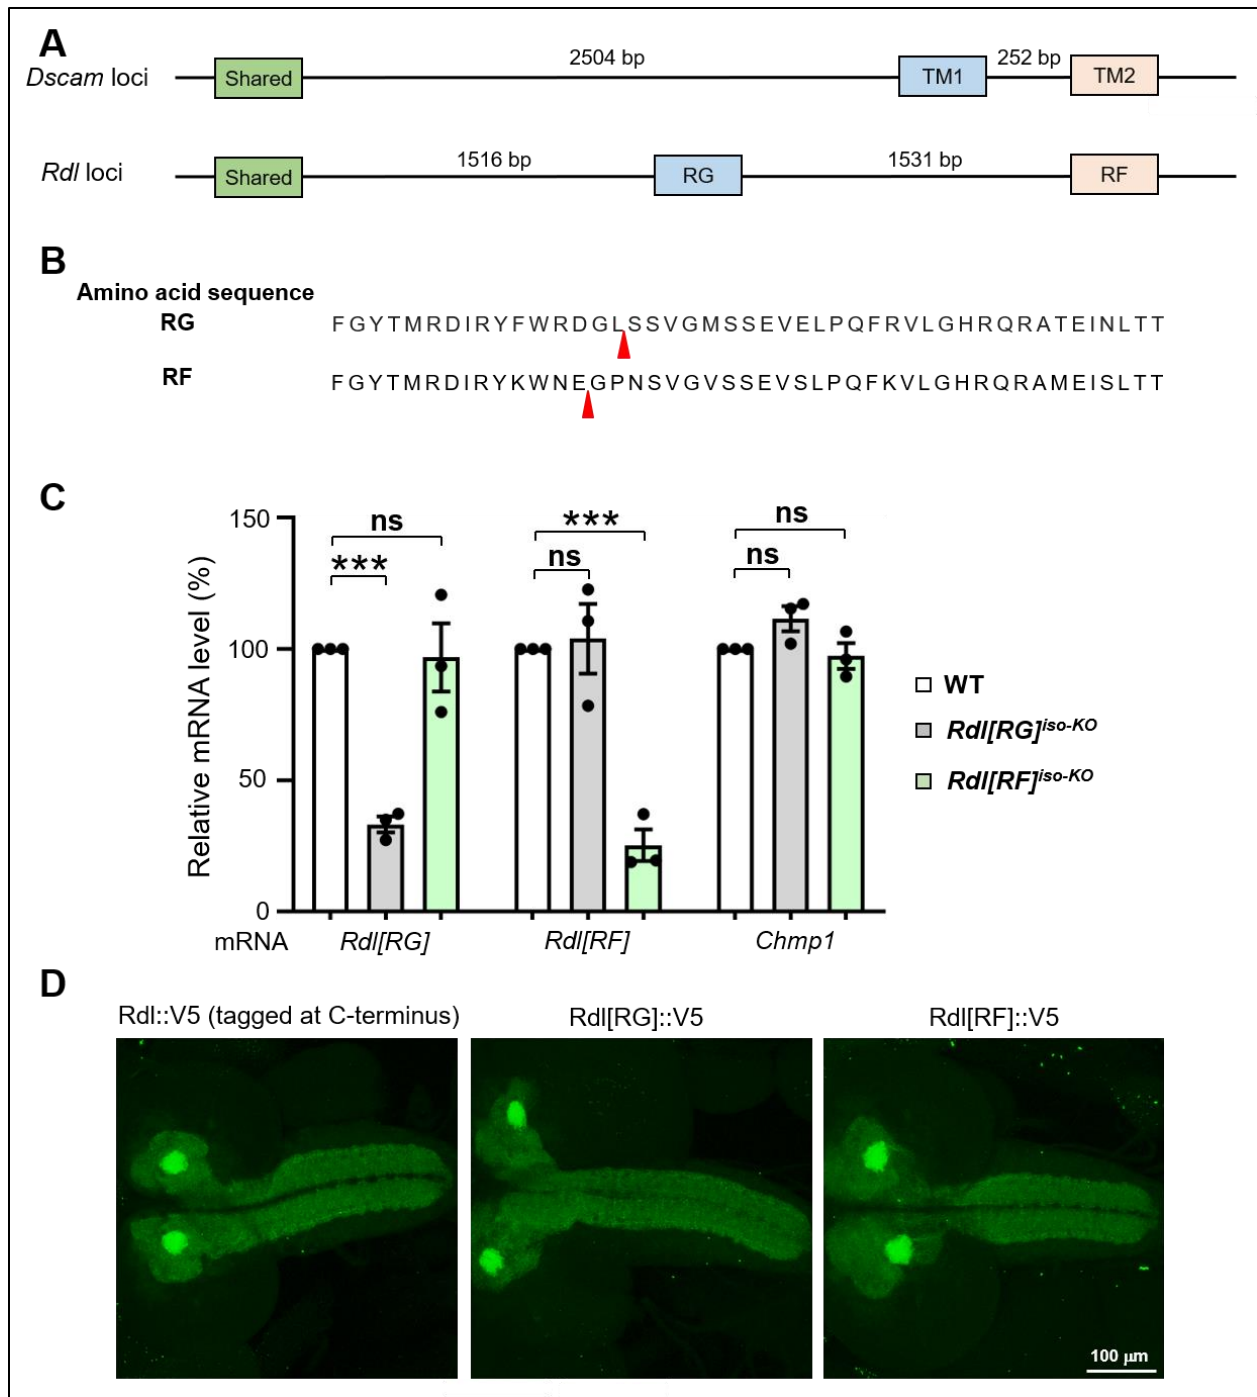

**Figure S7. Applying *isoTarget* to study Rdl isoforms. (related to Figure 1)**

(A) Schematics showing the introns and exons of interest in *Dscam* and *Rdl*.

(B) The *isoTarget* insertion sites in the RG and RF isoforms of Rdl. Shown are the amino acid sequences encoded by the RG and RF exons. Red arrowheads indicate the insertion sites.

(C) The full-length *iso-KO* cassette reduces the mRNA level of the targeted isoform but not that of the other isoform. mRNAs from the whole CNS of 3<sup>rd</sup> instar larvae were used for reverse-transcription real-time PCR.

(D) Endogenous RG and RF isoforms of Rdl show similar expression patterns that are comparable with that of total Rdl. The pan-neuronal driver *elav-Gal4* was used to tag endogenous Rdl[RG] or Rdl[RF] or RDL by driving the expression of UAS-R-recombinase. Shown is the staining of V5 epitope tag.
